1 **Population and Evolutionary Genetics**

2 **Subfamily-specific functionalization of diversified immune receptors in wild barley**

3

4 Takaki Maekawa<sup>\*,§</sup>, Barbara Kracher<sup>\*</sup>, Isabel M. L. Saur, Makoto Yoshikawa-Maekawa,  
5 Ronny Kellner, Artem Pankin, Maria von Korff, and Paul Schulze-Lefert

6 <sup>\*</sup>joint first authors

7 <sup>§</sup>corresponding author (maekawa@mpipz.mpg.de)

8

9 **Abstract**

10 Gene-for-gene immunity between plants and host-adapted pathogens is often linked to  
11 population-level diversification of immune receptors encoded by disease resistance (*R*) genes.  
12 The complex barley (*Hordeum vulgare* L.) *R* gene locus *Mildew Locus A* (*Mla*) provides  
13 isolate-specific resistance against the powdery mildew fungus *Blumeria graminis* f. sp. *hordei*  
14 (*Bgh*) and has been introgressed into modern barley cultivars from diverse germplasms,  
15 including the wild relative *H. spontaneum*. Known *Mla* disease resistance specificities to *Bgh*  
16 appear to encode allelic variants of the R Gene Homolog 1 (RGH1) family of nucleotide-  
17 binding domain and leucine-rich repeat (NLR) proteins. To gain insights into *Mla* diversity in  
18 wild barley populations, we here sequenced and assembled the transcriptomes of 50  
19 accessions of *H. spontaneum* representing nine populations distributed throughout the Fertile  
20 Crescent. The assembled *Mla* transcripts exhibited rich sequence diversity, which is linked  
21 neither to geographic origin nor population structure. *Mla* transcripts in the tested *H.*  
22 *spontaneum* accessions could be grouped into two similar-sized subfamilies based on two  
23 major N-terminal coiled-coil signaling domains that are both capable of eliciting cell death.  
24 The presence of positively selected sites, located mainly in the C-terminal leucine-rich repeats  
25 of both *MLA* subfamilies, together with the fact that both coiled-coil signaling domains  
26 mediate cell death, implies that the two subfamilies are actively maintained in the host  
27 population. Unexpectedly, known *MLA* receptor variants that confer *Bgh* resistance belong  
28 exclusively to one subfamily. Thus, signaling domain divergence, potentially to distinct  
29 pathogen populations, is an evolutionary signature of functional diversification of an immune  
30 receptor.

31

32 **Article Summary**

33

34 Powdery mildew poses a significant threat to barley production worldwide, and *Mildew Locus*  
35 *A* (*Mla*) gene variants have been introgressed into modern cultivars from wild barleys to  
36 provide disease resistance. We found that *Mla* genes in wild barley accessions are grouped  
37 into two subfamilies with all known variants effective against powdery mildew disease

38 belonging exclusively to one subfamily, suggesting that the two subfamilies have evolved to  
39 combat distinct pathogens. Furthermore, divergence of the signalling domain but not the  
40 pathogen-recognition domain of MLA receptors defines subfamily grouping, emphasizing the  
41 importance of choice of signalling domain haplotype for effective disease control.

42

## 43 **Introduction**

44 Adaptation to pathogens is linked to a range of evolutionary processes that result in genetic  
45 variation and affect disease resistance traits in a host population. In the co-evolutionary  
46 “arms race” model, recurrent allele fixation in a host population is predicted to reduce  
47 genetic diversity, whereas in the “trench warfare” model co-existence of functional and non-  
48 functional alleles is possible when a fitness penalty is associated with a functional allele in the  
49 absence of pathogens (Stahl, et al. 1999; Tian, et al. 2003). In plants, “gene-for-gene”  
50 resistance (Flor 1955) is frequently found in interactions between hosts and host-adapted  
51 pathogens and is often associated with population-level diversification of immune receptors  
52 encoded by disease resistance (*R*) genes (Maekawa, Kufer, et al. 2011). The products of these  
53 *R* genes recognize matching pathogen effectors, designated avirulence (*AVR*) effectors, and  
54 plants that lack matching *R* genes are susceptible to effector-mediated pathogen virulence  
55 (Jones and Dangl 2006). A single *R* gene can encode functionally diversified resistance alleles  
56 among individuals of the host population (Maekawa, et al. 2011). While such balancing  
57 selection at a given *R* locus can potentially be due to co-evolutionary diversification of a  
58 single *R* and *AVR* gene pair, in some cases it is rather explained by the recognition of multiple  
59 non-homologous effectors derived from different pathogens (Karasov, et al. 2014;  
60 Anderson, et al. 2016; Lu, et al. 2016).

61

62 Individual *R* genes are often members of larger gene families, organized in complex loci of  
63 paralogous genes, and can evolve through tandem and segmental gene duplications,  
64 recombination, unequal crossing-over, and point mutations (Jacob, et al. 2013). Most known  
65 *R* genes encode intracellular nucleotide-binding domain and leucine-rich repeat proteins  
66 (NLRs). Plant NLRs belong to a subclass of the STAND (signal transduction ATPases with  
67 numerous domains) superfamily of proteins (Maekawa et al., 2011), which possess variable  
68 N-terminal domains, a central conserved NB-ARC [Nucleotide-Binding, shared by Apoptotic  
69 protease activating factor 1 (Apaf-1), certain *R*-proteins, and Cell death protein 4 (CED-4)]  
70 domain, and C-terminal leucine-rich repeat region (LRR) with varying repeat number.  
71 Incorporation of either a TOLL/interleukin 1 receptor (TIR)-like domain or a coiled-coil (CC)  
72 domain at the N-terminus defines two major classes of NLRs, designated TNLs and CNLs,  
73 respectively. Extensive cross-plant species database searches have revealed that  
74 approximately 10% of plant NLRs additionally contain highly variable integrated domains

75 (Ellis 2016). Effector proteins can be recognized directly by NLRs inside plant cells, in what  
76 are essentially receptor-ligand interactions (Dodds, et al. 2006; Ortiz, et al. 2017), or,  
77 indirectly, through modifications of host proteins that are associated with the NLR receptor  
78 (Mackey, et al. 2002; Axtell and Staskawicz 2003; Dodds, et al. 2006; Gutierrez, et al. 2010;  
79 Ntoukakis, et al. 2013; Ortiz, et al. 2017). During direct non-self perception, the C-terminal  
80 LRR or integrated domains are known to function as major determinants of recognition  
81 specificity for AVR effectors (Dodds, et al. 2006; Cesari, et al. 2013; Maqbool, et al. 2015;  
82 Zhu, et al. 2017). Collectively, population-level *R* gene diversification and the diversity of  
83 NLR-mediated non-self recognition mechanisms maximize the ability of plants to cope with  
84 rapidly evolving pathogen effectors.

85

86 Powdery mildews are fungal plant pathogens that are ubiquitous in temperate regions of  
87 the world and infect nearly 10,000 species of angiosperms (Glawe 2008). Given that the  
88 powdery mildew disease caused by *Blumeria graminis* f. sp. *hordei* (*Bgh*) poses a  
89 significant threat to barley production (*Hordeum vulgare* L.), powdery mildew *R* loci,  
90 present in germplasm collections of barley relatives including wild barley (*H. spontaneum*  
91 L.), have been extensively investigated (Jahoor and Fischbeck 1987; Jørgensen 1994). These  
92 efforts have revealed numerous powdery mildew *R* loci and a subset was subsequently  
93 introgressed into modern barley cultivars to genetically control the disease (Jørgensen 1994).  
94 Among these, the Mildew resistance Locus A (*Mla*) is characterized by an exceptional  
95 functional diversification; each *Mla* locus in a given accession confers disease resistance to a  
96 distinctive set of *Bgh* test isolates (races), designated *Mla* resistance specificity (Jørgensen  
97 1994; Seeholzer, et al. 2010). More than 30 *Bgh* isolate (race)-specific resistance specificities  
98 map close or at the *Mla* locus (Jørgensen 1994). A 265-kb contiguous DNA sequence  
99 spanning the *Mla* locus in the barley reference cultivar ‘Morex’ consists of a cluster of CNL-  
100 encoding genes belonging to three distinctive families, which are designated *R* Gene  
101 Homolog (RGH) 1, RGH2 and RGH3 (Wei, et al. 2002). To date, 28 naturally diversified  
102 RGH1 sequences have been molecularly characterized and the majority of these are capable  
103 of conferring isolate-specific immunity to *Bgh* (Seeholzer, et al. 2010). These sequence  
104 variants appear to represent *Rgh1* alleles at the *Mla* locus as evidenced by the presence of an  
105 [AT]<sub>n</sub> microsatellite in the third intron (Shen, et al. 2003). However, the presence of the  
106 microsatellite has been validated for the genomic *Rgh1* sequences of only six *Mla* resistance  
107 specificities to *Bgh*. Cultivar ‘Morex’ carries a truncated and non-functional *Rgh1* allele,  
108 designated *Rgh1bcd* and few cultivars appear to harbor more than one functional *Rgh1* copy  
109 (Wei, et al. 2002; Seeholzer, et al. 2010). Our recent work demonstrated that sequence-related  
110 MLA receptor variants recognize sequence-unrelated *Bgh* effectors via direct interaction  
111 (Lu, et al. 2016). In addition, the wheat *Mla* orthologs *Sr33* (*Stem rust* resistance 33)

112 (Periyannan, et al. 2013) and *Sr50* (*Stem rust* resistance 50) (Mago, et al. 2015), introgressed  
113 from *Aegilops tauschii* and *Secale cereale*, respectively, confer resistance to the stem rust  
114 pathogen *Puccinia graminis* f. sp. *tritici* (*Pgt*) isolate Ug99, a pathogen that poses a major  
115 threat to global wheat production. These findings suggest that the last common ancestor of  
116 these cereals harbored an ancestral *Mla* gene and imply that *Mla* diversified to detect multiple  
117 non-homologous effectors from at least two unrelated fungal pathogens, the Ascomycete  
118 *Bgh* and Basidiomycete *Pgt*.

119

120 Overexpression of the MLA, Sr33, and Sr50 N-terminal CC domains is sufficient to initiate  
121 immune signaling similar to that mediated by the corresponding full-length receptors (i.e.  
122 activation of host cell death and transcriptional reprogramming for immune responses;  
123 (Maekawa, Cheng, et al. 2011; Casey, et al. 2016; Cesari, et al. 2016; Jacob, et al. 2018).  
124 Functional analysis of MLA chimeras suggests that the LRR determines AVR recognition  
125 specificities in *Bgh* resistance (Shen, et al. 2003). A previous study on a set of 25 *Rgh1/Mla*  
126 cDNA sequences identified a number of residues that have been subject to positive selection,  
127 located mainly at the surface-exposed concave side of the deduced LRR solenoid protein  
128 structure (Seeholzer, et al. 2010). In contrast, the N-terminal CC domain is mostly invariant  
129 among the same set of receptor variants (Seeholzer, et al. 2010). However, this analysis relied  
130 predominantly on known *Mla* resistance specificities to *Bgh* in cultivated barley and,  
131 therefore, might have underestimated *Rgh1* diversity at the *Mla* locus in wild barley  
132 populations.

133

134 In this study, we explored *Rgh1* sequence diversity between *H. spontaneum* accessions  
135 collected from the Fertile Crescent. In previous studies, due to sequence dissimilarity amongst  
136 the three *Rgh* families at *Mla*, *Rgh1* sequences encoding MLA receptors have been obtained  
137 either by PCR with gene-specific primers (Haltermann and Wise 2004; Seeholzer, et al. 2010)  
138 or DNA gel blot analysis using *Rgh1*-specific hybridization probes (Wei, et al. 1999; Zhou, et  
139 al. 2001). Here, we extracted transcripts belonging to the *Rgh1* family from RNA-Seq data  
140 collected from barley leaves. *De novo* transcriptome assembly of 50 wild barley accessions  
141 representing nine different wild barley populations (Pankin, et al. 2018) revealed a rich  
142 sequence diversity of *Mla* genes that segregate into two major subfamilies. Our findings  
143 imply that the divergence of the RGH1/MLA family has been driven by subfamily-specific  
144 functionalization to distinct pathogens. Furthermore, interspecies comparison of barley *Mla*  
145 and *Mla* orthologs in other cereals identified unique amino acid residues in the wheat Sr33  
146 CC domain, and the importance of these residues was subsequently tested in CC domain  
147 modeling and *in planta* functional assays. These natural CC sequence polymorphisms might



148 explain the previously reported differences in tertiary protein structures between the CC  
149 domains of barley MLA10 and wheat Sr33 (Maekawa, Cheng, et al. 2011; Casey, et al. 2016).

150

## 151 **Results**

### 152 **Identification of *Mla* sequences in wild barley accessions**

153 To gain deeper insights into *Mla* diversity in wild barley populations, we used transcriptome  
154 sequencing and assembly to identify *Mla* sequences in a set of 50 wild barley accessions that  
155 represent nine populations distributed throughout the Fertile Crescent (Pankin, et al. 2018).  
156 All accessions were purified by single seed descent to eliminate accession heterogeneity  
157 (Pankin, et al. 2018). We included six barley accessions (fig. S1) with already characterized  
158 *Mla* resistance alleles to verify that our workflow was able to correctly identify the  
159 corresponding gene transcript variants. For each accession, total mRNA was obtained from  
160 the first or second leaf at 16–19 hours after inoculation with *Blumeria graminis* f. sp. *hordei*  
161 (*Bgh*) conidiospores, as gene expression of *Mla1*, *Mla6*, and *Mla13* was previously shown to  
162 be pathogen-inducible (Caldo, et al. 2004). RNA samples were subjected to paired-end  
163 Illumina sequencing, which generated 14–23 Mio read pairs per sample. These RNA-Seq read  
164 pairs were then used for *de novo* assembly of transcriptomes for all accessions. Presumptive  
165 *Mla* transcripts were extracted from these assemblies by BLAST searches against a database  
166 of known *Mla* sequences (for details see Material and Methods).

167

168 Using this workflow, we were able to efficiently recover the known *Mla* alleles from all six  
169 previously characterized accessions, including those from a complex case in which two *Mla*  
170 copies encoding polymorphic MLA variants are present in a single accession (fig. S1). As this  
171 initial test verified the suitability of our experimental and bioinformatics pipeline, we next  
172 applied this analysis to all wild barley accessions and were able to retrieve *Mla* candidates for  
173 all but five of the 50 analyzed accessions (Table S1). Expression levels of the identified *Mla*  
174 candidate sequences were variable, ranging from 11 to 300 FPKM (fragments per kilobase of  
175 transcript per million mapped reads) for the six previously characterized accessions and from  
176 2 to 140 FPKM for the wild barley accessions (Table S2).

177

178 Among the 45 wild barley accessions with putative *Mla* transcripts, in 20 accessions we  
179 reliably identified two *Mla* copies and in two accessions we even found three putative *Mla*  
180 copies (Table S1). This contrasts with previous findings of a single *Rgh1/Mla* copy in cultivar  
181 ‘Morex’ (Wei, et al. 1999; Wei, et al. 2002), suggesting that in wild barley *Rgh1/Mla* has  
182 undergone frequent duplication. Five of the 69 identified transcript sequences were excluded  
183 from further downstream analysis because in three cases the deduced MLA proteins were C-  
184 terminally fused in-frame to a full-length RGH2 family member (i.e. RGH2-MLA) and two

185 other deduced MLA variants lacked the coiled-coil (CC) domain due to truncation of the  
186 transcript at the 5' end. The three RGH2-MLA fusions (FT146-2, FT158 and FT313-2) are  
187 99% identical to each other at the nucleotide level, although their corresponding barley  
188 accessions belong to different populations. Moreover, for five accessions a full-length  
189 transcript was identified, but due to a premature stop codon the predicted proteins were  
190 truncated, lacking part of the NB-ARC domain and the complete LRR. These five sequences  
191 were also not included in the phylogenetic analyses unless otherwise stated. Furthermore, we  
192 were unable to detect any apparent integrated domains other than the CC, NB-ARC, and LRR  
193 among the deduced protein sequences.

194

195

196

### 197 **Phylogenetic analysis of MLA sequences**

198 We performed multi-sequence alignment (MSA) and subsequent phylogenetic analysis on the  
199 59 full-length candidate MLA protein sequences retrieved from wild barley together with the  
200 28 previously characterized full-length MLA proteins (Seeholzer, et al. 2010) (excluding  
201 truncated MLA38-1) as well as the MLA homologs *TmMLA1* from wheat (Jordan, et al.  
202 2011), Sr33 from wheat (Periyannan, et al. 2013), Sr50 introgressed to wheat from *Secale*  
203 *cereale* (Mago, et al. 2015), and the closest homolog to MLA from the more distantly related  
204 *Brachypodium distachyon* (XP\_014754701.1). The MSA showed that one wild barley  
205 accession (FT170) contains the two previously characterized *Mla* alleles *Mla18-1* and *Mla18-*  
206 *2*, whereas two accessions (FT394 and FT355) contain the known *Mla25-1* (fig. 1a, fig. S2).  
207 Similarly, in one accession (FT113) one of the two deduced MLA variants differs from  
208 already characterized MLA25-1 by only two amino acids. In another accession (FT313) the  
209 aligned sequence of one of the two deduced MLA variants is identical to MLA34 but the wild  
210 barley sequence shows an extension in the LRR (fig. 1a, fig. S2). These results further  
211 confirmed that our method could be used to efficiently recover natural *Mla* variants in wild  
212 barley. Our findings indicate that the sequences of at least a few previously published *Mla*  
213 alleles have been conserved in extant wild barley populations after their introgression into  
214 modern barley cultivars.

215

216 Overall, the phylogenetic analysis revealed that the newly identified RGH1/MLA proteins  
217 from the wild barley accessions do not constitute a distinct clade but are rather distributed  
218 across the phylogeny together with known MLA variants conferring *Bgh* resistance  
219 (Seeholzer, et al. 2010; Jordan, et al. 2011) (fig. 1a). We conclude that these *Mla* transcripts,  
220 retrieved from the wild barley accessions, are derived from naturally occurring *Mla* variants.  
221 However, because of markedly lower sequence similarity to the others, two sequences, FT125

222 and FT013-2, might be derived from an *RGH* family other than *RGH1*. The phylogeny of  
223 MLA sequences does not show an obvious relation to the population of origin of the  
224 corresponding accessions, while a set of 13 known *Mla* resistance specificities to *Bgh* (e.g.  
225 *Mla6*, *Mla7* and *Mla9*) cluster in the phylogenetic tree (fig. 1a). To crosscheck the results of  
226 the neighbor-joining (NJ) phylogenetic analysis, we additionally generated a maximum-  
227 likelihood (ML) tree from the same data and compared the two phylogenies (fig. S3). As this  
228 comparison showed a good agreement between the two methods, further analyses were  
229 performed using the less computationally intensive NJ approach.

230

231 When including the five C-terminally truncated sequences in the phylogenetic analysis, we  
232 found that four of the five sequences with premature stop codons are identical to each other  
233 (fig. S4a). While the four corresponding barley accessions belong to the same UM population,  
234 this population also includes accessions harboring different MLA sequences (fig. 1a).  
235 Nevertheless, this is the only example in which a wild barley population (i.e. UM population)  
236 is seemingly dominated by an invariant *RGH1/MLA* coding sequence.

237

238 A BLAST search of the recently updated barley genome annotations (Mascher, et al. 2017)  
239 detected, besides the previously described *Rgh1bcd* copy (Wei, et al. 2002) another potential  
240 *Rgh1/Mla* copy (HORVU1Hr1G012190) encoding a protein with a slightly truncated LRR in  
241 the genome of cultivar ‘Morex’ (fig. S4b). Although no transcript corresponding to this gene  
242 is detected in tissues ([http://webblast.ipk-gatersleben.de/barley\\_ibsc/](http://webblast.ipk-gatersleben.de/barley_ibsc/)), an [AT]<sub>n</sub> microsatellite  
243 is found in the third intron, which is commonly found in the six previously isolated *Mla*  
244 resistance alleles functioning in *Bgh* resistance (Shen, et al. 2003). Based on the genome of  
245 the cultivar ‘Morex’ (Mascher, et al. 2017), the corresponding gene would be located ~ 22  
246 Mb downstream of the previously reported *Mla* locus (Wei, et al. 2002), suggesting that  
247 *Rgh1/Mla* family members can be encoded at distant locations in the barley genome.

248

#### 249 **Exclusive deployment of one MLA subfamily in modern barley cultivars for *Bgh*** 250 **resistance**

251 For a more detailed examination of MLA sequence diversity, we focused on the three  
252 functional domains of MLA and performed phylogenetic analyses for each domain separately.  
253 In agreement with a previous report using mainly barley cultivars (Jordan, et al. 2011), our  
254 extended dataset detected two distinct subfamilies in the wild barley accessions, which can be  
255 defined by two distinct CC domain haplotypes (fig. 1a, b, fig. S2). Although the bootstrap  
256 support for discrimination of the two distinct CC domain subfamilies in the neighbor-joining  
257 tree is not very high, neighbor-net analysis provided supporting evidence with very high  
258 bootstrap support (> 95%: fig. 1 c and d). This result suggests that the underlying

259 evolutionary history of *Rgh1/Mla* is not tree-like. Furthermore, we found a striking pattern of  
260 CC sequence diversification, characterized by differential occupancy of charged or non-  
261 charged amino acids in subfamily 1 and 2 (indicated by arrows; fig. S5). These charge  
262 alterations ultimately distinguish the two MLA/RGH1 subfamilies. Thirty-nine (61%) of the  
263 64 MLA sequences from wild barley (including the five C-terminally truncated proteins)  
264 belong to CC domain subfamily 1 and 39% to subfamily 2 (Table S1). Within the 64 novel  
265 sequences and 29 known MLA sequences, we can distinguish 27 sequence haplotypes for the  
266 CC domain, of which 16 belong to subfamily 1 and nine to subfamily 2 (fig. 1e, Table S3).  
267 Notably, all known MLA variants conferring resistance to *Bgh* belong exclusively to  
268 subfamily 1. Furthermore, the most common CC haplotype (haplotype CC01) for the MLA  
269 variants providing *Bgh* resistance (13 of 25 variants; Table S3) is found only in three wild  
270 barley accessions (FT170-2, FT458 and FT471). These data suggest that the CC haplotype in  
271 subfamily 1 might confer resistance to *Bgh* in agricultural settings and that this haplotype has  
272 predominantly been deployed in modern barley cultivars.

273

274 As for the full-length and CC domain sequences, NJ phylogenetic and neighbor-net analyses  
275 based on the NB-ARC domain and LRR showed that many clades contain the reported MLA  
276 sequences and sequences from wild accessions (fig. 2a-d). We distinguished a total of 44  
277 sequence haplotypes for the NB-ARC domain (fig. 1e). Among them, NB-ARC domains of  
278 12 MLA variants conferring *Bgh* resistance constitute the most common haplotype together  
279 with those of FT458 and FT313-1 (fig. 2a, c). Whilst the clear separation into the two MLA  
280 subfamilies is partly retained for the NB-ARC domain (fig. 2c), the LRR does not contribute  
281 to the subfamily grouping (fig. 2d). Moreover, pair-wise comparisons of the phylogenies for  
282 the three domains show that while certain smaller phylogenetic groups might be conserved  
283 across domains, major discrepancies can be detected especially between the LRR phylogeny  
284 and the NB-ARC and CC phylogenies (fig. S5). This suggests that the three domains,  
285 especially the LRR, have evolved largely independently from each other.

286

### 287 **The majority of sites under positive selection locate to the LRR**

288 To estimate MLA sequence diversity, we excluded the two most divergent candidate  
289 sequences (FT125 and FT013-2), as we could not exclude that these represent RGH proteins  
290 other than RGH1. Based on the remaining 57 full-length candidate MLA sequences and the  
291 28 previously published full-length MLA variants we observed an overall nucleotide diversity  
292 ( $\pi$ ) of 0.068. Sequence diversity within the wild accessions ( $\pi = 0.072$ ) is slightly higher than  
293 in the previously published MLA variants ( $\pi = 0.055$ ) and sequence diversity is also higher in  
294 subfamily 2 ( $\pi = 0.060$ ) compared to subfamily 1 ( $\pi = 0.045$ ; Table S4).

295

296 The pair-wise comparisons of the phylogenies for the three MLA domains (fig. S5)  
297 demonstrate highly domain-specific sequence selection within a single gene. We thus  
298 performed dedicated statistical analyses on the coding sequences of the 85 full-length MLA  
299 sequences to identify sites under episodic (MEME; Mixed Effects Model of Evolution) or  
300 pervasive (FUBAR; Fast Unconstrained Bayesian AppRoximation) positive selection. The  
301 former analysis was included to also allow detection of positive selection sites acting on a  
302 subset of branches in a phylogeny. In accordance with previous observations (Seeholzer, et al.  
303 2010), the majority of sites under positive selection, whether pervasive or episodic, are  
304 located in the LRR (fig. 3a). Using this complete dataset, we also observed a number of sites  
305 under episodic positive selection ( $p < 0.1$ ) in the CC domain, which mostly involve residues  
306 that differ between the two subfamilies (fig. 3a). Accordingly, when we performed separate  
307 analyses for the two subfamilies, we observed that within each subfamily only very few sites  
308 under positive selection are in the CC or NB-ARC domains (fig. 3b,c). In these separate  
309 analyses for both subfamilies, sites under pervasive positive selection (posterior probability  $>$   
310 0.95) are detected almost exclusively in the LRR, and many of these sites in the LRR seem to  
311 be under positive selection within both subfamilies as well as in the complete set (fig. 3). The  
312 presence of additional sites under episodic positive selection in subfamilies 1 and 2 suggests  
313 distinct selection pressures acting on a few branches of both subfamilies (fig. 3b, c). The  
314 location and clustering of sites under positive selection for subfamily 1 is largely conserved  
315 between the sequences from wild barley and known MLA resistance specificities to *Bgh* (fig.  
316 S7a, b). Among 18 sites for the wild accessions and 16 sites for known MLA resistance  
317 specificities to *Bgh* that are located in the  $\beta$ -strand motifs in the LRR, 13 sites are shared (fig.  
318 S7c-f).

319

320

### 321 **The subfamily 2 CC domain is functional in cell death**

322 The ability of RGH1 members from subfamily 2 to confer resistance to *Bgh* remains unclear,  
323 as no *Bgh* resistance activities were detected for MLA16-1, MLA18-1, and MLA25-1  
324 (Seeholzer, et al. 2010; Jordan, et al. 2011). This raises the question of whether subfamily 2  
325 MLA receptors can generally act as disease resistance proteins. Our phylogenetic analyses of  
326 MLA CC domains allowed us to detect a close relationship between Sr50 (conferring  
327 resistance to *Puccinia graminis* f.sp. *tritici*; *Pgt* in wheat) and subfamily 2 MLAs (fig. 1b, d).  
328 Overexpression of MLA10 representing the haplotype CC01 (Table S3), Sr33 and Sr50 N-  
329 terminal CC domains initiates downstream signaling events that are comparable to the  
330 signaling mediated by the corresponding full-length receptors, including the execution of cell  
331 death (Maekawa, Cheng, et al. 2011; Casey, et al. 2016; Cesari, et al. 2016; Jacob, et al.  
332 2018). We thus examined whether subfamily 2 MLA CC domain variants are capable of

333 triggering cell death *in planta*. Overexpression of the CC domain of FT394, one of the closest  
334 barley variants of wheat Sr50, was able to induce cell death in *Nicotiana benthamiana* leaves  
335 (fig. 4), suggesting that *Mla* alleles in subfamily 2 encode receptors with cell death activity.  
336 Although the FT394 CC variant is 93% and 67% identical to the CC domains of Sr50 and  
337 MLA10, respectively, the time of onset and confluence of the necrotic lesions induced by  
338 FT394 CC and MLA10 CC were comparable, whereas lesions elicited by the expression of  
339 Sr33 and Sr50 CC domains remained invariably patchy.

340

#### 341 **The Sr33 CC domain harbors unique amino acid substitutions**

342 In contrast to Sr50, Sr33 is assigned to a clade of the CC domain together with *Tm*MLA1 (fig.  
343 1b, d). Notably, interspecies comparison of MLA or MLA-like sequences identified unique  
344 amino acid polymorphisms in the Sr33 and *Tm*MLA1 CC-domains (fig. 5a). The 21<sup>st</sup>  
345 positions of the CC domains of MLA functioning in *Bgh* resistance, MLA from wild barley  
346 and homologs of some Triticeae family members are generally occupied by aspartate (D) or  
347 glutamate (E), but glycine (G) occupies the corresponding positions in Sr33 and *Tm*MLA1.  
348 The same substitution is found in an accession of rye (*Secale cereale*) (fig. 5a). The structure  
349 of the Sr33 CC domain (6–120 amino acids) adopts a monomeric four-helix bundle  
350 conformation, while the structure of the MLA10 CC domain (5–120 amino acids) is arranged  
351 in an antiparallel homodimer that adopts a helix-loop-helix fold (Maekawa, Cheng, et al.  
352 2011; Casey, et al. 2016; Fig, 5B). Intriguingly, in the corresponding structures the 21<sup>st</sup>  
353 position of MLA10 locates to the middle of the alpha helix, while in Sr33 this position with  
354 an adjacent valine corresponds to a loop region of the CC domain (fig. 5b, fig. S8a). These  
355 amino acid differences might account for the differences in tertiary protein structure between  
356 the CC domains of MLA10 and Sr33.

357

358 To examine the role of these two amino acids in structural folding, we simulated secondary  
359 structures of wild-type and mutated CC domains of MLA10 and Sr33 using PSIPRED  
360 (Buchan, et al. 2013). For simplicity, we used the first 40 amino acids for the two following  
361 analyses. MLA10 (wild-type) and the mutated MLA10 (T20V E21G) that carries the Sr33-  
362 type residues were predicted to be structurally similar, while Sr33 (wild-type) was predicted  
363 to contain an additional loop compared to the MLA10 variants. Notably, this loop was no  
364 longer predicted to form in the Sr33 (V20T G21E) mutant carrying the MLA10-type residues  
365 (fig. S8b). We additionally assessed the impact of each single mutation using STRUM (Quan,  
366 et al. 2016). Both T20V and E21G substitutions in MLA10 were predicted to decrease the  
367 protein stability, while V20T but not G21E was predicted to stabilize the Sr33 structure.  
368 These data suggest that the two unique residues (or either one of the two) in Sr33 could



369 destabilize the helix fold in its CC structure and, as a consequence, the overall CC structure of  
370 Sr33 might differ from the CC domain of MLA10.

371

372 We then experimentally tested cell death mediated by the CC domains of MLA10 (wild-type)  
373 and a site-directed mutant form, MLA10 (T20V E21G), carrying the Sr33-type residues.  
374 Necrotic lesions in *N. benthamiana* leaves elicited by these two CC domain variants were  
375 comparable in size and macroscopic appearance. In reciprocal experiments, lesions elicited by  
376 the CC domains of Sr33 (wild-type) and mutant Sr33 (V20T G21E) carrying the MLA10-type  
377 residues were also comparable (fig. 5c). Thus, these amino acid sequence polymorphisms in  
378 the two CC domains do not abrogate cell death mediated by both NLRs.

379

## 380 Discussion

### 381 Divergence of *Mla* subfamilies in wild barley populations

382 We revealed a rich sequence diversity of the *Rgh1/Mla* gene family in wild barley accessions  
383 representing nine populations distributed throughout the Fertile Crescent of the Middle East.  
384 In addition, in wild barley *Rgh1/Mla* has undergone frequent gene duplication (Table S1),  
385 necessitating a revision of the current view that *Mla* recognition specificities to *Bgh* represent  
386 alleles of a single gene (Shen, et al. 2003). We found no clear evidence for geographic  
387 isolation and population structure of particular *Mla* sequence clades. Similarly, a genome-  
388 wide survey of *NLR* genes in *A. thaliana* revealed no evidence for regional selection of  
389 particular disease resistance genes (Bakker, et al. 2006). The observed similar ratio of *Mla*  
390 subfamily 1 and 2 members among individual wild barley accessions (37 and 27,  
391 respectively; Table S1) was unexpected and suggests that a balancing selection mechanism  
392 maintains the two subfamilies in the host populations. Pathogen selection pressure is likely  
393 driving the observed sequence diversification at least within subfamily 1 because all known  
394 *Mla* resistance specificities to *Bgh* belong to this subfamily (Seeholzer, et al. 2010; Jordan, et  
395 al. 2011). Compared to the CC domain, sequences of the LRR do not group into two  
396 subfamilies (fig. 2d). This contrasting pattern indicates that selection regimes differ between  
397 the CC and LRR domains that might involve recombination events that swap LRRs between  
398 two *Rgh1/Mla* alleles in the two different subfamilies. A QTL analysis on disease resistance  
399 in the field, conducted in a cross derived from the barley cultivar ‘Carola’ and the wild barley  
400 accession FT394 that carries only one subfamily 2 member (Table S1), did not reveal any  
401 powdery mildew resistance mediated by the *Mla* locus (Wang 2005). In addition, the *Mla*  
402 locus did not associate with any of 13 tested agronomic traits in a population derived from a  
403 cross between barley cultivar ‘Apex’ and FT394, suggesting that this *Mla* allele does not  
404 affect agronomic performance in the field (Pillen, et al. 2003). Thus, the exclusive  
405 deployment of subfamily 1 members in modern barley cultivars for *Bgh* resistance is probably

406 not due to any negative impacts on agronomical performance associated with introgression of  
407 subfamily 2. Conservation of NLR motifs needed for immune receptor function (fig. S2)  
408 (Tamelung, et al. 2006; Rairdan, et al. 2008), together with positively selected sites in the  
409 LRR among subfamily 2 members (fig. 3c), implies a similar functional diversification of  
410 subfamily 2 NLRs in response to barley pathogen(s). Whether subfamily 2 NLRs confer  
411 disease resistance to avirulence genes present in yet uncharacterized *Bgh* populations or other  
412 pathogens remains to be tested. The presence of both subfamily 1 and 2 members in genomes  
413 of several accessions (14 out of 50 accessions; Table S1) also predicts non-redundant immune  
414 functions of two subfamilies.

415

416 The CC domain sequences of barley subfamily 2 members are closely related to that of Sr50,  
417 which is encoded by an *Mla* ortholog originating from rye (*Secale cereale*) and was  
418 introgressed into wheat for resistance against the stem rust fungus *Puccinia graminis* f. sp.  
419 *tritici* (*Pgt*; (Mago, et al. 2015). Rye and wheat diverged from each other approximately 3–4  
420 Mya and barley diverged from wheat 8–9 Mya (Krattinger and Keller 2016). Closer  
421 inspection of the phylogenetic tree of MLA CC domains indicates that subfamily 2 CC is  
422 evolutionarily maintained, at least in rye and barley (fig. 1b and d). In contrast, the presence  
423 of subfamily 1 members appears to be restricted to barley (fig. 1b and d). The CC domains of  
424 both barley MLA subfamilies are capable of cell death initiation, further supporting our  
425 hypothesis that members belonging to subfamily 2 also encode NLRs mediating innate  
426 immunity. The MLA subfamilies are mainly defined by two major haplotypes of the N-  
427 terminal CC signaling domain rather than the C-terminal LRR that has been shown to  
428 determine AVR recognition specificities in *Bgh* resistance (fig. 1 and 2; Shen, et al. 2003).  
429 What evolutionary mechanism has maintained the two barley MLA subfamilies in the host  
430 population? To date, only MLA subfamily 1 members have been shown to confer immunity  
431 to the barley powdery mildew fungus (Seeholzer, et al. 2010; Jordan, et al. 2011). One  
432 possible explanation is that *Bgh* has overcome immune signaling mediated by the CC of  
433 subfamily 2 members. For example, the effectors of the *Pgt* stem rust pathogen can suppress  
434 cell death mediated by the Sr50 CC domain when overexpressed (Chen, et al. 2017).  
435 However, overexpression of a barley MLA chimera containing CC and NB-ARC domains of  
436 MLA25-1, a subfamily 2 member of unknown function, fused to the LRR of barley MLA1, a  
437 subfamily 1 member, retains MLA1-dependent resistance to *Bgh* (Jordan, et al. 2011). This  
438 finding might suggest that subfamily 1 and 2 CC domains can be interchanged without  
439 affecting effector recognition. Together, this demonstrates that subfamily 2 CC and NB-ARC  
440 domains can be functional in *Bgh* resistance when overexpressed but does not exclude the  
441 possibility that in wild barley populations, with native *Mla* gene expression levels, immunity

442 to *Bgh* mediated by the CC of subfamily 2 members is inefficient in limiting pathogen  
443 reproduction.

444

445 Consistent with extensive CC diversification in the phylogeny of MLA subfamilies 1 and 2,  
446 the corresponding sequence alignment reveals 22 residues that are differentially occupied by  
447 charged or non-charged amino acids in the two subfamilies (indicated by arrows fig. S5).

448 These charged residues are likely surface-localized (Maekawa, Cheng, et al. 2011; Casey, et  
449 al. 2016), thereby altering the surface charge distribution of the signaling module.

450 Interestingly, the CC domains of MLA10 (subfamily 1), but not MLA18-1 and MLA25-1  
451 (both subfamily 2), interact with barley WRKY transcription factors that repress immune

452 responses to powdery mildew fungi (Shen, et al. 2007; Jordan, et al. 2011). The N-terminal 46

453 amino acids of the barley MLA10 CC domain, including three of the aforementioned 13

454 charge alterations, are critical for this interaction (Shen, et al. 2007). Therefore, whilst the CC

455 of MLA subfamily 1 is predicted to de-repress immune responses via direct interaction with

456 these WRKYs (Shen, et al. 2007), the CC of MLA subfamily 2 members might interact with

457 other host proteins and interfere with the same transcriptional machinery or another cellular

458 process conferring immunity and cell death.

459

460 **Does CC signaling domain diversification suggest diversification of CC signaling**  
461 **pathways?**

462 Barley MLA10 was shown to localize to both the nucleus and the cytoplasm and experiments

463 involving enforced mis-localization of the receptor suggest cell compartment-specific

464 bifurcation of receptor-mediated cell death and disease resistance signaling in the cytoplasm

465 and nucleus, respectively (Shen, et al. 2007; Bai, et al. 2012). Different CC structural folds

466 have been reported for sequence-related barley MLA10 and wheat Sr33 (Maekawa, Cheng, et

467 al. 2011; Casey, et al. 2016). This has given rise to a model in which the two structures

468 represent closed “off-state” and open “on-state” conformations of the corresponding full-

469 length NLRs, possibly linked to receptor oligomerization (El Kasmi and Nishimura 2016).

470 Proteins or protein modules that can adopt more than one native folded conformation are

471 more common than previously thought and are designated metamorphic or fold-switching

472 proteins (Murzin 2008; Porter and Looger 2018). Our interspecies comparison identified

473 unique amino acid polymorphisms between barley MLA and wheat Sr33 CC domains (T<sub>20</sub>E<sub>21</sub>

474 and V<sub>20</sub>G<sub>21</sub>, respectively; fig. 5A). Directed substitutions of T<sub>20</sub>E<sub>21</sub> to V<sub>20</sub>G<sub>21</sub> in the barley

475 MLA10 CC do not significantly affect the capacity of the N-terminal domain alone to trigger

476 cell death in *N. benthamiana* and, similarly, the reciprocal substitutions in the wheat Sr33 CC

477 did not impair its capacity for cell death activation. If the unique natural CC amino acid

478 polymorphisms directly contribute to the reported structural differences of MLA10 and Sr33

479 CC modules, one would have expected that one of the mutant CC variants would show  
480 weakened cell death in the *N. benthamiana* leaf assay. The extent of cell death was  
481 macroscopically indistinguishable between wild-type and CC mutant variants, showing that  
482 both structures are cell death signaling-competent forms. We assume that in *N. benthamiana*  
483 leaves the confluent cell death phenotype linked to MLA10 CC expression compared to the  
484 characteristic cell death patches elicited by Sr33 CC expression reflects immune responses of  
485 differing strengths triggered by the respective CC modules. Given that both characteristic cell  
486 death phenotypes were retained upon expression of the tested CC mutants (fig. 5), other  
487 amino acid polymorphisms between MLA10 and Sr33 CC, including the predicted  
488 differential surface charge distribution and differential interactions with other host signaling  
489 components, must account for the observed macroscopic differences in cell death. In this  
490 model, the equilibrium between receptor ‘on’ and ‘off’ states might influence the ratio of  
491 nuclear to cytoplasmic MLA-mediated defense outputs through differential interactions with  
492 host signaling components. This could explain why enforced cytoplasmic receptor  
493 localization is sufficient to induce stem rust resistance in transgenic *Sr33*-expressing wheat  
494 (Cesari, et al. 2016), whereas the nuclear receptor pool of barley MLA10 is necessary to  
495 induce *Bgh* resistance (Shen, et al. 2007). Similarly, divergence of the barley RGH1/MLA  
496 signaling domain in wild barley might indicate haplotype-dependent immune responses that  
497 are maintained to control distinct pathogen populations.

498

#### 499 **The LRR as pathogen recognition determinant**

500 The location and clustering of sites under positive selection for subfamily 1 is generally  
501 conserved between the MLA sequences from wild barley and functionally validated receptor  
502 variants conferring resistance to *Bgh* (fig. 3, fig. S7). Notably, the majority of positive  
503 selection sites are found on the surface of the predicted concave side of the LRR solenoid and  
504 these sites are mostly shared between the natural MLA variants (fig. S7). This implies that the  
505 previously reported sites under positive selection, which were detected among a set of MLA  
506 variants conferring *Bgh* resistance (Seeholzer, et al. 2010), closely reflect the evolutionarily  
507 pressure acting on this receptor region in wild barley populations. The positively selected  
508 sites are mainly located between leucine-rich repeats 10 to 15 in MLA subfamilies 1 and 2.  
509 Wheat Pm3 is predicted to contain 28 leucine-rich repeats with positively selected sites  
510 located mainly between repeats 19 and 28 (Krattinger and Keller 2016). Recent data from our  
511 lab suggest that MLA receptors directly recognize sequence-unrelated *Bgh* avirulence  
512 effectors (Saur and Bauer et al., unpublished data). Thus, the clustering of positively selected  
513 amino acid residues in the C-terminal leucine-rich repeats of both MLA receptor subfamilies  
514 might define contact residues for direct effector interactions that do not compromise  
515 conformational change(s) of the full-length receptor from the off-state to the on-state. The

516 relevance of positive selection sites for direct interactions with avirulence proteins has been  
517 shown for a subset of L resistance alleles in flax conferring immunity to the rust pathogen  
518 *Melampsora linii* (Dodds, et al. 2006; Wang, et al. 2007).

519

### 520 **Mining wild barley germplasm for novel *Mla* resistance specificities**

521 In wheat, the *Pm3* locus is the main source of genetically encoded disease resistance against  
522 the wheat powdery mildew fungus, *B. graminis* f. sp. *tritici* (*Bgt*; Krattinger and Keller 2016).  
523 Similar to barley *Mla*, 17 allelic variants of the *Pm3* gene have been identified in wheat  
524 populations that determine isolate-specific immunity to *Bgt* carrying matching AVR genes  
525 (Krattinger and Keller 2016). Although *Pm3* is widely deployed in domesticated hexaploid  
526 wheat (*Triticum aestivum*), in *T. dicoccoides*, the progenitor of most cultivated wheat species,  
527 high presence-absence variation of polymorphism in the *Pm3* gene was observed as well as a  
528 low sequence diversity (61% of 208 accessions lacked the *Pm3* gene; (Srichumpa, et al. 2005;  
529 Sela, et al. 2014)). This has been explained by a potential maintenance cost of *Pm3* in *T.*  
530 *dicoccoides* in the absence of pathogen selection pressure. Consequently, it is thought that the  
531 observed functional diversification in *Pm3* has occurred primarily after wheat domestication ~  
532 10,000 years ago (Srichumpa, et al. 2005; Sela, et al. 2014). This contrasts with the detection  
533 of *Mla* transcripts encoding sequence-diversified full-length MLA immune receptors in at  
534 least 40 out of 50 tested wild barley accessions. This and the fact that at least some  
535 characterized *Mla* recognition specificities to *Bgh* in cultivated barley are derived from wild  
536 barley or barley landraces might help to explain why 25 functionally validated *Mla*  
537 recognition specificities to *Bgh* exhibit on average > 91% sequence identity, whereas 17  
538 deduced allelic wheat *Pm3* receptors share > 97% sequence identity (Seeholzer, et al. 2010).  
539 Accordingly, continuous *Bgh* selection pressure and a much longer evolutionary time span  
540 has been available for *Mla* functional diversification in wild barley, and this could account for  
541 the greater sequence diversity of MLA compared to *Pm3* NLRs. Several novel natural *Mla*  
542 sequences from wild barley are distributed across the *Mla* phylogenetic tree, with functionally  
543 validated *Mla* resistance specificities to *Bgh* confined to subfamily 1. A conspicuous  
544 clustering of *Mla* resistance specificities is seen in a sublineage of subfamily 1 containing 13  
545 known resistance specificities, including *Mla6*, *Mla7*, *Mla9*, *Mla10*, etc. (fig. 1). The  
546 identification of four novel *Mla* sequence variants from wild barley belonging to this  
547 sublineage makes these receptor variants prime candidates for future targeted disease  
548 resistance assays. Such experiments could be used to examine whether the receptor variants  
549 exhibit overlapping recognition specificities with known MLA receptors or to detect novel  
550 *Bgh AVR<sub>A</sub>* genes.

551



551 **Main figures**

552

553 **fig. 1: Phylogenetic analysis of 91 MLA and MLA-like protein sequences.** (a) Unrooted  
554 neighbor-joining (NJ) tree analysis and (c) neighbor-net (NN) analysis of full-length proteins.  
555 (b) NJ tree and (d) NN analysis of the CC (coiled-coil) domain (AA 1–151). These analyses  
556 were conducted using 28 previously published MLA protein sequences from barley (indicated  
557 in black) (Seeholzer et al, 2010), four MLA homologs from other species (indicated in black),  
558 and 59 candidate MLA sequences identified in this study from 50 wild barley accessions  
559 (colored by population of origin). Only MLA sequences harboring all three domains with  
560 more than 895 AA were used in this analysis. (a and b) Red circles mark branches with  
561 bootstrap support > 0.75 (500 bootstrap replicates). (c and d) The proteins sequences  
562 indicated by orange and blue edges are separately grouped with bootstrap support > 0.95  
563 (1000 bootstrap replicates). The branch length of dashed lines is reduced to half of the actual  
564 length. (e) Number of haplotypes of the CC, NB-ARC domains and LRR of 87 barley MLA  
565 sequences found in this and previous studies. No *Bgh* resistance activity was detected for  
566 MLA16-1, MLA18-1, and MLA25-1 (Seeholzer, et al. 2010). \*The population information of  
567 FT393 is unavailable.

568

569 **fig. 2: Phylogenetic analysis of the MLA protein domains.** (a) NJ tree analysis and (c) NN  
570 analysis of the MLA NB-ARC (nucleotide-binding adaptor shared by APAF-1, R proteins,  
571 and CED-4) domain (AA 180–481). (b) NJ tree analysis and (D) NN analysis of the MLA  
572 LRR (leucine-rich repeat region) (AA 1490–end). These analyses were conducted using 28  
573 previously published MLA protein sequences from barley (indicated in black) (Seeholzer, et  
574 al. 2010), four sequences of MLA homologs in other species (indicated in black), and 59  
575 candidate MLA sequences that were identified in this study from 50 wild barley accessions  
576 (colored by population of origin). Only MLA sequences harboring all three domains with  
577 more than 895 AA were used in this analysis. Red circles mark branches with bootstrap  
578 support > 0.75 (500 bootstrap replicates). Blue arrowheads indicate members of CC domain  
579 subfamily 2 shown in fig. 1. The branch length of dashed lines (c) and (d) is reduced to 10%  
580 and half of the actual length, respectively. \*The population information of FT393 is  
581 unavailable.

582

583 **fig. 3: Identification of positively selected sites in previously known and newly identified**  
584 **candidate MLA cDNAs.** (a) Sites under episodic (upper panel; blue bars) or pervasive (lower  
585 panel: pink bars) positive selection in a set of 85 known and newly identified MLA cDNAs.  
586 (b) Sites under episodic (upper panel; blue bars) or pervasive (lower panel: pink bars) positive  
587 selection in 61 known and newly identified MLAs carrying a CC domain belonging to  
588 subfamily 1. (c) Sites under episodic (upper panel; blue bars) or pervasive (lower panel: pink  
589 bars) positive selection in 24 known and newly identified MLAs carrying a CC domain  
590 belonging to subfamily 2. Only full-length MLA sequences (at least 895 AA) from barley  
591 were included in these analyses. To test for episodic selection, we used MEME and judged all  
592 sites with a p value below 0.1 to be under positive selection. To test for pervasive selection,  
593 we additionally used FUBAR and judged all sites with a posterior probability above 0.95 to  
594 be under positive selection. AA 1–151: CC domain; AA 180–481: NB-ARC domain; AA  
595 490-end: LRR.

596

597

598 **fig. 4: CC domains of subfamily 2 MLA FT394 exhibits cell death activity.** (a) *Nicotiana*  
599 *benthamiana* plants were transiently transformed to express the CC domains of MLA10\_1–  
600 160 amino acids (AA), FT394\_1–163AA, Sr50\_1–163AA, and Sr33\_1–160AA, each fused  
601 C-terminally to monomeric YFP, or empty vector control; the picture was taken three days  
602 post infiltration. (b) Immunoblot analysis corresponding to (a). Transformed leaf tissue was  
603 harvested 24 hours post infiltration. Proteins were analyzed after gel electrophoresis and  
604 western blotting with an anti-GFP antibody.



605

606 **fig. 5. Sr33 carries unique amino acid substitutions in a loop region of the coiled-coil**  
607 **(CC) domain.**

608 (a) Amino acid sequence alignment of the CC variants (1–40 amino acids (AA), see Table  
609 S3b) of MLA and MLA orthologs. The unique residues in the Sr33 CC domain are indicated  
610 by orange circles. (b) The solved tertiary protein structures of MLA10 (PDB ID 3QFL) and  
611 Sr33 (PDB ID 2NCG) CC domains. A protomer of the CC domain dimer of MLA10 is  
612 shown. (c) The unique amino acids do not contribute to the intensity of cell death in  
613 *Nicotiana benthamiana*. *N. benthamiana* plants were transiently transformed to express the  
614 CC domains of MLA10\_1–160AA, MLA10\_1–160AA (T20V, E21G), Sr33\_1–160AA, and  
615 Sr33\_1–160AA (V20T, G20E) each fused C-terminally to monomeric YFP, or EV and a  
616 picture was taken three days post infiltration. (d) Immunoblot analysis corresponding to (c).  
617 Transformed leaf tissue was harvested 24 hours post infiltration. Proteins were analyzed after  
618 gel electrophoresis and western blotting with an anti-GFP antibody.  
619

## 619 **Supplementary figures**

620

### 621 **fig. S1: Validation of MLA identification workflow through recovery of known MLA**

622 **sequences.** (a) Amino acid (AA) sequence alignment of seven known MLA alleles and the  
623 corresponding sequences as obtained by our recovery workflow starting from RNA-  
624 sequencing data of the indicated barley lines. For visualization, an AA consensus sequence  
625 was obtained from 28 previously published full-length barley MLA sequences (Seeholzer, et  
626 al. 2010) and for each MLA polymorphic residues relative to this consensus are highlighted in  
627 color (gray color indicates alignment gaps). The three domains of MLA are indicated at the  
628 top. (b) Unweighted Pair Group Method with Arithmetic mean tree analysis of the 14 MLA  
629 sequences. Tree calculation was performed using the pairwise deletion option. Red circles  
630 mark branches with a bootstrap support of 1 (1,000 bootstrap replicates).

631

### 632 **fig. S2: Amino acid (AA) sequence alignment of 91 full-length MLA protein sequences.**

633 The AA alignment includes full-length sequences of 28 previously published MLA protein  
634 sequences from barley (indicated in black) (Seeholzer et al, 2010), four MLA homologs from  
635 other species (indicated in black), and 59 candidate MLA sequences identified in this study  
636 from 50 wild barley accessions (colored by population of origin). For visualization, an AA  
637 consensus sequence was obtained from the 28 previously published barley MLA sequences  
638 and polymorphic residues in each MLA relative to this consensus are highlighted in color  
639 (gray color indicates alignment gaps). The three domains of MLA are indicated at the top.  
640 Asterisks mark the EDVID motif (Rairdan, et al. 2008) in the coiled-coil (CC) domain and  
641 the Walker A motif (Tameling, et al. 2006) with the p-loop in the nucleotide-binding (NB)  
642 domain. Only full-length MLA sequences (at least 895 AA) were included in this analysis.

643

### 644 **fig. S3: Comparison of neighbor-joining (NJ) and maximum-likelihood (ML) trees**

645 **obtained from 91 full-length MLA protein sequences.** Trees include full-length amino acid  
646 (AA) sequences of 28 previously published MLAs from barley (Seeholzer, et al. 2010), four  
647 MLA homologs from other species, and 59 candidate MLA sequences identified in this study  
648 from 50 wild barley accessions. All positions containing gaps or missing data were omitted  
649 from the tree calculations (complete deletion option). A tanglegram was created from the two  
650 trees using the R package ‘dendextend’, in which lines connect the same isolates and colors  
651 represent sub-trees conserved between the two methods. Branches shown as dashed lines  
652 indicate differences between the trees.

653

### 654 **fig. S4: Neighbor-joining (NJ) tree analyses including additional full-length MLA**

655 **protein sequences.** (a) The unrooted NJ tree includes the same 91 amino acid (AA)  
656 sequences as shown in fig. 1 plus five additional MLA candidate sequences found in the wild  
657 barley accessions. These sequences contain a premature stop at positions 631 (grey) and 561  
658 (red), respectively. (b) The unrooted NJ tree includes the same 91 AA sequences as shown in  
659 fig. 1 plus the sequences of two additional MLA homologs from barley cv. ‘Morex’ (RGH1bcd  
660 and a 2nd candidate extracted from the most recent ‘Morex’ assembly) and several additional  
661 RGH1 homologs from *Secale cereale* (six sequences) and *Aegilops tauschii* (four sequences).  
662 Additional sequences not included in fig. 1 are highlighted in bold. For tree calculation, all  
663 positions containing gaps or missing data were omitted (complete deletion option). Red  
664 circles mark branches with bootstrap support > 0.75 (500 bootstrap replicates).

665

### 666 **fig. S5: Amino acid sequence alignment of the CC domain haplotypes representing**

667 **subfamily 1 or subfamily 2 MLA proteins.**

668 The alignment shows 22 residues that are differentially occupied by charged or non-charged  
669 amino acids in subfamilies 1 and 2 (indicated by arrows).

670

### 671 **fig. S6: Comparison of neighbor-joining (NJ) trees obtained for the three major MLA**

672 **protein domains.** (a) Comparison of NJ trees obtained for the CC (amino acids 1–151) and  
673 NB-ARC (amino acids 180–481) domains. (b) Comparison of NJ trees obtained for the CC

674 domain (amino acids 1–151) and LRR (amino acids 490–end). (c) Comparison of NJ trees  
675 obtained for the NB-ARC domain (amino acids 180–481) and LRR (amino acids 490–end).  
676 All trees include amino acid sequences of 28 previously published MLAs from barley  
677 (Seeholzer et al, 2010), four MLA homologs from other species, and 59 candidate MLA  
678 sequences identified in this study from 50 wild barley accessions. All positions containing  
679 gaps or missing data were omitted from the tree calculations (complete deletion option). For  
680 each comparison, a tanglegram was created from the two corresponding NJ trees using the R  
681 package ‘dendextend’, in which lines connect the same isolates and colors represent sub-trees  
682 conserved between the two domains. Branches shown as dashed lines indicate differences  
683 between the trees.

684

685 **fig. S7: Identification of positively selected sites in MLA conferring resistance to *Bgh***  
686 **and wild MLA belonging to subfamily 1.**

687

688 (a) Sites under episodic (upper panel; blue bars) or pervasive (lower panel: pink bars) positive  
689 selection in a set of 25 known MLA conferring resistance to *Bgh*.

690 (b) Sites under episodic (upper panel; blue bars) or pervasive (lower panel: pink bars) positive  
691 selection in 35 newly identified MLAs of wild barley carrying a CC domain belonging to  
692 subfamily 1. Only full-length MLA sequences (at least 895 amino acids) from barley were  
693 included in these analyses. To test for episodic selection we used MEME and judged all sites  
694 with a p value below 0.1 to be under positive selection. To test for pervasive selection, we  
695 additionally used FUBAR and judged all sites with a posterior probability above 0.95 to be  
696 under positive selection. (c) The deduced secondary structures of the 15 leucine-rich repeat  
697 regions (LRR) of MLA1. (d) The deduced secondary structures of the 15 LRR of FT352-2.  
698 MLA1 and FT352-2 are selected as representatives of MLA conferring resistance to *Bgh* and  
699 the subfamily 1 of wild barley, respectively. The first LRR starts at position 553 for both  
700 MLA1 and FT352-2. Amino acid residues under positive selection are indicated by red letters  
701 (posterior probability > 0.95). The LxxLxLxx sites, which are proposed to form a short,  
702 solvent-exposed  $\beta$ -strand motif (Kajava and Kobe 2002), are indicated. Note that the 14<sup>th</sup>  
703 LRR is irregular with three instead of two x positions after the first L position. Black:  
704 hydrophobic core residue; gray: site of any amino acid termed x in the LxxLxLxx motif. (e)  
705 The hypothetical tertiary structures of LRR of MLA1 shown in (c) predicted by IntFOLD  
706 (McGuffin, et al. 2015). (f) The hypothetical tertiary structures of LRR of FT352-2 shown in  
707 (d) predicted by IntFOLD. Amino acid residues under positive selection are indicated by red  
708 spheres (posterior probability > 0.95).

709

710 **fig. S8. Secondary structure prediction of the mutated coiled-coil (CC) domains of**  
711 **MLA10 and Sr33.**

712 (a) Episodically selected sites (blue) and pervasively selected sites (pink) shown in fig. 3A are  
713 indicated in the secondary structures of MLA10 (PDB ID 3QFL) and Sr33 (PDB ID 2NCG).  
714 The unique residues in the Sr33 CC domain are indicated by orange circles. The schematic  
715 secondary structures were obtained from the RCSB Protein Data Bank. (b) Secondary  
716 structure prediction for the CC domains (1–40 AA) of MLA10, Sr33, MLA10 (T20V, E21G),  
717 and Sr33 (V20T, G20E) using PSIPRED (Buchan DWA, et al. (2013). The red boxes indicate  
718 the mutated residues.

719

720 **Supplementary tables**

721 **Table S1:** Summary of geographic origin, population information and identified MLA  
722 sequences for the 50 wild barley lines used in this study

723

724 **Table S2:** Number of sequenced read pairs per sample and alignment coverage of identified  
725 MLA sequences in 50 wild barley lines

726

727 **Table S3:** Summary of unique CC-domain haplotypes (at 100% sequence identity) in wild  
728 and domesticated barley

729

730 **Table S4:** Summary of nucleotide diversity  $\pi$  for different subsets of MLA and candidate  
731 MLA sequences/sequence domains

732

733 **Table S5:** The sequences used in the phylogenetic analyses

734

735 **Supplementary files**

736 Sequence alignments (fasta) used in figure 1 and 2.

737

738

## 738 **Materials and Methods**

739

### 740 **RNA-Sequencing**

741 Total mRNA from barley plants was obtained from the first or second leaves at 16–19 hours  
742 after challenge with *Blumeria graminis* f. sp. *hordei* (*Bgh*) using the RNeasy plant mini kit  
743 (Qiagen). RNA-sequencing (RNA-Seq) libraries were prepared by the Max Planck Genome  
744 Centre Cologne (Germany) using the Illumina TruSeq stranded RNA sample preparation kit  
745 and were subjected to 150-bp paired-end sequencing using the Illumina HiSeq2500  
746 Sequencing System. The RNA-Seq data generated for this study have been deposited in the  
747 National Center for Biotechnology Information Sequence Read Archive (SRA) database  
748 (BioProject accession no. PRJNA432492, SRA accession no. SRP132475).

749

### 750 ***De novo* transcriptome assembly**

751 For each barley accession, a *de novo* transcriptome assembly was performed using Trinity  
752 (version 2.2.0) (Grabherr, et al. 2011) with default parameter settings for paired-end reads;  
753 transcript abundance was subsequently estimated (with options --est\_method RSEM --  
754 align\_method bowtie) and peptide sequences of the best-scoring ORFs were extracted using  
755 TransDecoder (Haas, et al. 2013).

756

### 757 **Extraction of MLA candidate sequences**

758 To identify candidate MLA sequences, BLAST searches were performed for the assembled  
759 transcripts (from Trinity) and predicted peptides (from TransDecoder) against the CDS and  
760 protein sequences of the previously described *Mla* recognition specificities (Seeholzer, et al.  
761 2010) with E value cutoffs of  $1e^{-6}$ . For each sample, we identified the Trinity transcript group  
762 that contained the best BLAST hit (based on score, identity, and alignment length) against  
763 MLA. From this transcript group, a representative candidate MLA transcript was extracted  
764 manually based on the BLAST statistics (score, identity, alignment length), transcript  
765 abundance (RSEM), inspection of transcript read coverage in the Integrative Genomics  
766 Viewer (IGV) (Robinson, et al. 2011), and inspection of a Clustal Omega (Sievers, et al.  
767 2011) multi-sequence alignment (MSA) of the identified and known MLA sequences. Based  
768 on this manual inspection, potential sequence errors were corrected according to the RNA-  
769 Seq read alignment consensus (IGV visualization) and split sequences were merged where  
770 appropriate based on the RNA-Seq read alignment and MSA. Subsequently, the corrected  
771 transcripts were used to extract corresponding best-scoring ORFs with TransDecoder, and  
772 RNA-Seq reads were mapped against the corrected sequences using bowtie2 (version 2.2.8)  
773 (Langmead and Salzberg 2012) with default parameters. The resulting alignments were again  
774 inspected in IGV and remaining sequence errors were corrected where required. This

775 procedure of alternating read alignment/ORF prediction and manual screening and error  
776 correction was repeated until the RNA-Seq read consensus conformed to the predicted  
777 transcript sequence. In the end, from these corrected transcript sequence the final candidate  
778 *Mla*/MLA CDS and peptide sequences were extracted with TransDecoder. Accession number  
779 for the *Mla*/MLA sequences from wild barley are listed in Table S5.

780

### 781 **Phylogenetic Analyses**

782 The previously published sequences included in the phylogenetic analyses were retrieved  
783 from NCBI (see Table S5 for corresponding accession numbers). As the NCBI accessions for  
784 MLA7 (AAQ55540) and MLA10 (AAQ55541) exhibit atypical amino acid variations  
785 compared to the previously obtained sequences (Seeholzer, et al. 2010; Maekawa, Cheng, et  
786 al. 2011), for these two MLAs we used the corresponding previously published sequences  
787 instead of the NCBI entries. The closest MLA homolog in *Brachypodium distachion* was  
788 identified by a BLAST search of the MLA consensus sequence against the *Brachypodium*  
789 sequences in the non-redundant NCBI protein database. The MLA homologs in the barley  
790 cultivar ‘Morex’ were extracted by BLAST searches of the MLA CC-domain against the  
791 updated ‘Morex’ genome annotations (Mascher, et al. 2017) ([http://webblast.ipk-](http://webblast.ipk-gatersleben.de/barley_ibsc/)  
792 [gatersleben.de/barley\\_ibsc/](http://webblast.ipk-gatersleben.de/barley_ibsc/)).

793 The MSA visualizations were generated using Unipro UGENE (version) (Okonechnikov, et  
794 al. 2012) with Clustal Omega as an alignment tool. The MLA consensus sequence for this  
795 visualization was generated from the 25 previously published full-length MLA protein  
796 sequences (Seeholzer, et al. 2010). Phylogenetic trees (NJ, ML) were generated using  
797 MEGA5 (Tamura, et al. 2011). Neighbor-Net network analysis was performed using  
798 SplitsTree4 (applying “proteinMLdist” model: JTT) (Huson and Bryant 2006). CC-domain  
799 haplotypes were extracted from an MSA with Clustal Omega. Tanglegrams were generated  
800 from the MEGA5 trees (after midpoint rooting) using the ‘tanglegram’ function of the R  
801 package ‘dendextend’ (Galili 2015) with previous stepwise greedy rotation to untangle the  
802 trees (using function ‘untangle’ with method “step2side”).

803 For the phylogenetic analyses of individual MLA domains, we regarded the first N-terminal  
804 151 amino acids (1–151) as the CC domain, the sequence stretching from amino acid 180 to  
805 481 as the NB-ARC domain, and the sequence from amino acid 490 to the end as the LRR.

806 The analyses of nucleotide diversity and positive selection were performed on codon  
807 alignments of the CDS sequences generated in MEGA5 (using ClustalW as an alignment  
808 tool). Nucleotide diversity was then calculated from these alignments using the “nuc.div”  
809 function in the R package ‘pegas’ (Paradis 2010). Sites under episodic positive selection were  
810 identified using MEME (Mixed Effects Model of Evolution) (Murrell, et al. 2012) with



811 default parameters and sites under pervasive positive selection were identified using FUBAR  
812 (Fast, Unconstrained Bayesian AppRoximation) (Murrell, et al. 2013) with default settings.

813

#### 814 **Generation of expression constructs**

815 All CC domains were synthesized by the GeneArt Gene Synthesis service (Thermo Scientific)  
816 as pDONR221 entry clones and transferred into the pXCSG-GW-mYFP expression vector  
817 (Garcia, et al. 2010) using LR Clonase II (Thermo Scientific). The resulting expression  
818 constructs were examined by Sanger sequencing (Eurofins).

819

#### 820 **Agrobacterium-mediated transient transformation of *Nicotiana benthamiana* leaves.**

821 *Agrobacterium tumefaciens* GV3101 pMP90K were freshly transformed with the respective  
822 constructs of interest and grown from single colonies in liquid Luria broth medium containing  
823 appropriate antibiotics for ~ 24 hours at 28°C. Bacterial cells were harvested by  
824 centrifugation at 2,500 × g for 15 min, followed by resuspension in infiltration medium (10  
825 mM MES, pH 5.6, 10 mM MgCl<sub>2</sub>, and 200 μM acetosyringone) to a final OD<sub>600</sub> = 1.0.  
826 Cultures were incubated for 2 to 4 h at 28°C with agitation at 180 rpm before infiltration into  
827 leaves of three-to-five-week-old *N. benthamiana* plants. Cell death was assessed three days  
828 post infiltration. Experiments were repeated three times independently and the representative  
829 image is shown.

#### 830 **Plant protein extraction and fusion protein detection by immunoblotting.**

831 Plant proteins were extracted as described previously (Saur, et al. 2015) with the addition of  
832 IGEPAL at a final concentration of 0.25% to the protein extraction buffer. Extracts were  
833 diluted 4:1 with 4 x Laemmli buffer (Bio-Rad, 1610747) and heated to 95°C for 5 min.  
834 Samples were separated on 10% SDS-PAGE gels, blotted onto PVDF membranes, and  
835 probed with anti-GFP (abcam ab6556) followed by anti-rabbit IgG-HRP (Santa Cruz  
836 Biotechnology sc-2313) secondary antibodies. Proteins were detected by HRP activity on  
837 SuperSignal Femto chemiluminescent substrate (Thermo Fisher 34095) using a Gel Doc™  
838 XR+ Gel Documentation System (Bio-Rad). Experiments were repeated three times  
839 independently and the representative image is shown.

840

841

842

843

## 844 **Data Availability Statement**

845 Strains and plasmids are available upon request. Supplemental files are available at FigShare.  
846 Sequence data are available at GenBank; the accession numbers are listed in Table S5. The  
847 RNA-Seq data generated for this study have been deposited in the National Center for  
848 Biotechnology Information Sequence Read Archive (SRA) database (BioProject accession  
849 no. PRJNA432492, SRA accession no. SRP132475).

## 850 851 **Acknowledgments**

852  
853 We thank the Max Planck Genome Centre Cologne for RNA-Seq and Petra Köchner and  
854 Sabine Haigis for technical assistance. We thank Matthew J. Moscou for sharing unpublished  
855 data. We also thank Jijie Chai and Ruben Garrido Oter for helpful suggestions. This work was  
856 supported by the Max Planck Society (B.K., I.M.L.S., M.Y.-M., and P.S.-L.) and the German  
857 Research Foundation within the scope of the Collaborative Research Centre Grant SFB670  
858 (to B.K., T.M., and P.S.-L.) and German Cluster of Excellence on Plant Sciences (CEPLAS)  
859 EXC1028 (to R.K. and M.v.K.). I.M.L.S. is supported by a Long-Term Fellowship from The  
860 European Molecular Biology Organization (ALTF 368-2016).

861

862

## 863 **Author contributions**

864 T.M. and P.S.-L. conceived and designed the research; I.M.L.S. and M.Y.-M. performed the  
865 research; T.M., B.K., I.M.L.S., and R.K. analyzed data; A.P. and M.v.K. provided materials.  
866 T.M., B.K., I.M.L.S., and P.S.-L. wrote the paper with input from all co-authors.

867

868

869

## 870 **References**

871

872 Anderson C, Khan MA, Catanzariti AM, Jack CA, Nemri A, Lawrence GJ, Upadhyaya NM,  
873 Hardham AR, Ellis JG, Dodds PN, et al. 2016. Genome analysis and avirulence gene cloning  
874 using a high-density RADseq linkage map of the flax rust fungus, *Melampsora lini*. *BMC*  
875 *Genomics* 17:667.  
876 Axtell MJ, Staskawicz BJ. 2003. Initiation of RPS2-specified disease resistance in  
877 *Arabidopsis* is coupled to the AvrRpt2-directed elimination of RIN4. *Cell* 112:369-377.  
878 Bai S, Liu J, Chang C, Zhang L, Maekawa T, Wang Q, Xiao W, Liu Y, Chai J, Takken FL, et  
879 al. 2012. Structure-function analysis of barley NLR immune receptor MLA10 reveals its cell  
880 compartment specific activity in cell death and disease resistance. *PLoS Pathog* 8:e1002752.  
881 Bakker EG, Toomajian C, Kreitman M, Bergelson J. 2006. A genome-wide survey of R gene  
882 polymorphisms in *Arabidopsis*. *Plant Cell* 18:1803-1818.  
883 Buchan DW, Minneci F, Nugent TC, Bryson K, Jones DT. 2013. Scalable web services for  
884 the PSIPRED Protein Analysis Workbench. *Nucleic Acids Res* 41:W349-357.

- 885 Caldo RA, Nettleton D, Wise RP. 2004. Interaction-dependent gene expression in Mla-  
886 specified response to barley powdery mildew. *Plant Cell* 16:2514-2528.
- 887 Casey LW, Lavrencic P, Bentham AR, Cesari S, Ericsson DJ, Croll T, Turk D, Anderson PA,  
888 Mark AE, Dodds PN, et al. 2016. The CC domain structure from the wheat stem rust  
889 resistance protein Sr33 challenges paradigms for dimerization in plant NLR proteins. *Proc*  
890 *Natl Acad Sci U S A*.
- 891 Cesari S, Moore J, Chen C, Webb D, Periyannan S, Mago R, Bernoux M, Lagudah ES, Dodds  
892 PN. 2016. Cytosolic activation of cell death and stem rust resistance by cereal MLA-family  
893 CC-NLR proteins. *Proc Natl Acad Sci U S A* 113:10204-10209.
- 894 Cesari S, Thilliez G, Ribot C, Chalvon V, Michel C, Jauneau A, Rivas S, Alaux L, Kanzaki  
895 H, Okuyama Y, et al. 2013. The rice resistance protein pair RGA4/RGA5 recognizes the  
896 Magnaporthe oryzae effectors AVR-Pia and AVR1-CO39 by direct binding. *Plant Cell*  
897 25:1463-1481.
- 898 Chen J, Upadhyaya NM, Ortiz D, Sperschneider J, Li F, Bouton C, Breen S, Dong C, Xu B,  
899 Zhang X, et al. 2017. Loss of AvrSr50 by somatic exchange in stem rust leads to virulence for  
900 Sr50 resistance in wheat. *Science* 358:1607-1610.
- 901 Dodds PN, Lawrence GJ, Catanzariti AM, Teh T, Wang CI, Ayliffe MA, Kobe B, Ellis JG.  
902 2006. Direct protein interaction underlies gene-for-gene specificity and coevolution of the  
903 flax resistance genes and flax rust avirulence genes. *Proc Natl Acad Sci U S A* 103:8888-  
904 8893.
- 905 El Kasmi F, Nishimura MT. 2016. Structural insights into plant NLR immune receptor  
906 function. *Proc Natl Acad Sci U S A*.
- 907 Ellis JG. 2016. Integrated decoys and effector traps: how to catch a plant pathogen. *BMC Biol*  
908 14:13.
- 909 Flor HH. 1995. Host–parasite interaction in flax rusts – its genetics and other implications.  
910 *Phytopathology* 45:680–685.
- 911 Galili T. 2015. dendextend: an R package for visualizing, adjusting and comparing trees of  
912 hierarchical clustering. *Bioinformatics* 31:3718-3720.
- 913 Garcia AV, Blanvillain-Baufume S, Huibers RP, Wiermer M, Li G, Gobbato E, Rietz S,  
914 Parker JE. 2010. Balanced nuclear and cytoplasmic activities of EDS1 are required for a  
915 complete plant innate immune response. *PLoS Pathog* 6:e1000970.
- 916 Glawe DA. 2008. The powdery mildews: a review of the world's most familiar (yet poorly  
917 known) plant pathogens. *Annu Rev Phytopathol* 46:27-51.
- 918 Grabherr MG, Haas BJ, Yassour M, Levin JZ, Thompson DA, Amit I, Adiconis X, Fan L,  
919 Raychowdhury R, Zeng Q, et al. 2011. Full-length transcriptome assembly from RNA-Seq  
920 data without a reference genome. *Nat Biotechnol* 29:644-652.
- 921 Gutierrez JR, Balmuth AL, Ntoukakis V, Mucyn TS, Gimenez-Ibanez S, Jones AM, Rathjen  
922 JP. 2010. Prf immune complexes of tomato are oligomeric and contain multiple Pto-like  
923 kinases that diversify effector recognition. *Plant J* 61:507-518.
- 924 Haas BJ, Papanicolaou A, Yassour M, Grabherr M, Blood PD, Bowden J, Couger MB, Eccles  
925 D, Li B, Lieber M, et al. 2013. De novo transcript sequence reconstruction from RNA-seq  
926 using the Trinity platform for reference generation and analysis. *Nat Protoc* 8:1494-1512.
- 927 Halterman DA, Wise RP. 2004. A single-amino acid substitution in the sixth leucine-rich  
928 repeat of barley MLA6 and MLA13 alleviates dependence on RAR1 for disease resistance  
929 signaling. *Plant J* 38:215-226.
- 930 Huson DH, Bryant D. 2006. Application of phylogenetic networks in evolutionary studies.  
931 *Mol Biol Evol* 23:254-267.
- 932 Jacob F, Kracher B, Mine A, Seyfferth C, Blanvillain-Baufume S, Parker JE, Tsuda K,  
933 Schulze-Lefert P, Maekawa T. 2018. A dominant-interfering camta3 mutation compromises  
934 primary transcriptional outputs mediated by both cell surface and intracellular immune  
935 receptors in Arabidopsis thaliana. *New Phytol* 217:1667-1680.
- 936 Jacob F, Vernaldi S, Maekawa T. 2013. Evolution and Conservation of Plant NLR Functions.  
937 *Front Immunol* 4:297.
- 938 Jones JD, Dangl JL. 2006. The plant immune system. *Nature* 444:323-329.

- 939 Jahoor A, Fischbeck G 1987. Genetical Studies of Resistance of Powdery Mildew in Barley  
940 Lines Derived from *Hordeum spontaneum* Collected from Israel. *Plant Breeding* 99:265-273  
941 Jordan T, Seeholzer S, Schwizer S, Toller A, Somssich IE, Keller B. 2011. The wheat *Mla*  
942 homologue *TmMla1* exhibits an evolutionarily conserved function against powdery mildew in  
943 both wheat and barley. *Plant J* 65:610-621.  
944 Jørgensen, J. H. 1994. Genetics of powdery mildew resistance in barley. *Crit. Rev. Plant Sci*  
945 13:97-119.  
946 Kajava AV, Kobe B. 2002. Assessment of the ability to model proteins with leucine-rich  
947 repeats in light of the latest structural information. *Protein Sci* 11:1082-1090.  
948 Karasov TL, Kniskern JM, Gao L, DeYoung BJ, Ding J, Dubiella U, Lastra RO, Nallu S,  
949 Roux F, Innes RW, et al. 2014. The long-term maintenance of a resistance polymorphism  
950 through diffuse interactions. *Nature* 512:436-440.  
951 Krattinger SG, Keller B. 2016. Molecular genetics and evolution of disease resistance in  
952 cereals. *New Phytol* 212:320-332.  
953 Langmead B, Salzberg SL. 2012. Fast gapped-read alignment with Bowtie 2. *Nat Methods*  
954 9:357-359.  
955 Lu X, Kracher B, Saur IM, Bauer S, Ellwood SR, Wise R, Yaeno T, Maekawa T, Schulze-  
956 Lefert P. 2016. Allelic barley *MLA* immune receptors recognize sequence-unrelated  
957 avirulence effectors of the powdery mildew pathogen. *Proc Natl Acad Sci U S A* 113:E6486-  
958 E6495.  
959 Mackey D, Holt BF, 3rd, Wiig A, Dangl JL. 2002. *RIN4* interacts with *Pseudomonas syringae*  
960 type III effector molecules and is required for *RPM1*-mediated resistance in *Arabidopsis*. *Cell*  
961 108:743-754.  
962 Maekawa T, Cheng W, Spiridon LN, Toller A, Lukasik E, Saijo Y, Liu P, Shen QH, Micluta  
963 MA, Somssich IE, et al. 2011. Coiled-coil domain-dependent homodimerization of  
964 intracellular barley immune receptors defines a minimal functional module for triggering cell  
965 death. *Cell Host Microbe* 9:187-199.  
966 Maekawa T, Kufer TA, Schulze-Lefert P. 2011. NLR functions in plant and animal immune  
967 systems: so far and yet so close. *Nat Immunol* 12:817-826.  
968 Mago R, Zhang P, Vautrin S, Simkova H, Bansal U, Luo MC, Rouse M, Karaoglu H,  
969 Periyannan S, Kolmer J, et al. 2015. The wheat *Sr50* gene reveals rich diversity at a cereal  
970 disease resistance locus. *Nat Plants* 1:15186.  
971 Maqbool A, Saitoh H, Franceschetti M, Stevenson CE, Uemura A, Kanzaki H, Kamoun S,  
972 Terauchi R, Banfield MJ. 2015. Structural basis of pathogen recognition by an integrated  
973 HMA domain in a plant NLR immune receptor. *Elife* 4.  
974 Mascher M, Gundlach H, Himmelbach A, Beier S, Twardziok SO, Wicker T, Radchuk V,  
975 Dockter C, Hedley PE, Russell J, et al. 2017. A chromosome conformation capture ordered  
976 sequence of the barley genome. *Nature* 544:427-433.  
977 McGuffin LJ, Atkins JD, Salehe BR, Shuid AN, Roche DB. 2015. IntFOLD: an integrated  
978 server for modelling protein structures and functions from amino acid sequences. *Nucleic*  
979 *Acids Res* 43:W169-173.  
980 Murrell B, Moola S, Mabona A, Weighill T, Sheward D, Kosakovsky Pond SL, Scheffler K.  
981 2013. FUBAR: a fast, unconstrained bayesian approximation for inferring selection. *Mol Biol*  
982 *Evol* 30:1196-1205.  
983 Murrell B, Wertheim JO, Moola S, Weighill T, Scheffler K, Kosakovsky Pond SL. 2012.  
984 Detecting individual sites subject to episodic diversifying selection. *PLoS Genet* 8:e1002764.  
985 Murzin AG. 2008. Biochemistry. Metamorphic proteins. *Science* 320:1725-1726.  
986 Ntoukakis V, Balmuth AL, Mucyn TS, Gutierrez JR, Jones AM, Rathjen JP. 2013. The  
987 tomato *Prf* complex is a molecular trap for bacterial effectors based on *Pto*  
988 transphosphorylation. *PLoS Pathog* 9:e1003123.  
989 Okonechnikov K, Golosova O, Fursov M, team U. 2012. Unipro UGENE: a unified  
990 bioinformatics toolkit. *Bioinformatics* 28:1166-1167.  
991 Ortiz D, de Guillen K, Cesari S, Chalvon V, Gracy J, Padilla A, Kroj T. 2017. Recognition of  
992 the *Magnaporthe oryzae* Effector AVR-Pia by the Decoy Domain of the Rice NLR Immune  
993 Receptor RGA5. *Plant Cell* 29:156-168.

- 994 Pankin A, Altmuller J, Becker C, von Korff M. 2018. Targeted resequencing reveals genomic  
995 signatures of barley domestication. *New Phytol* 218:1247-1259.
- 996 Paradis E. 2010. pegas: an R package for population genetics with an integrated-modular  
997 approach. *Bioinformatics* 26:419-420.
- 998 Periyannan S, Moore J, Ayliffe M, Bansal U, Wang X, Huang L, Deal K, Luo M, Kong X,  
999 Bariana H, et al. 2013. The gene Sr33, an ortholog of barley Mla genes, encodes resistance to  
1000 wheat stem rust race Ug99. *Science* 341:786-788.
- 1001 Pillen K, Zacharias A, Leon J. 2003. Advanced backcross QTL analysis in barley (*Hordeum*  
1002 *vulgare* L.). *Theor Appl Genet* 107:340-352.
- 1003 Porter LL, Looger LL. 2018. Extant fold-switching proteins are widespread. *Proc Natl Acad*  
1004 *Sci U S A*.
- 1005 Quan L, Lv Q, Zhang Y. 2016. STRUM: structure-based prediction of protein stability  
1006 changes upon single-point mutation. *Bioinformatics* 32:2936-2946.
- 1007 Rairdan GJ, Collier SM, Sacco MA, Baldwin TT, Boettrich T, Moffett P. 2008. The coiled-  
1008 coil and nucleotide binding domains of the Potato Rx disease resistance protein function in  
1009 pathogen recognition and signaling. *Plant Cell* 20:739-751.
- 1010 Robinson JT, Thorvaldsdottir H, Winckler W, Guttman M, Lander ES, Getz G, Mesirov JP.  
1011 2011. Integrative genomics viewer. *Nat Biotechnol* 29:24-26.
- 1012 Saur IM, Conlan BF, Rathjen JP. 2015. The N-terminal domain of the tomato immune protein  
1013 Prf contains multiple homotypic and Pto kinase interaction sites. *J Biol Chem* 290:11258-  
1014 11267.
- 1015 Seeholzer S, Tsuchimatsu T, Jordan T, Bieri S, Pajonk S, Yang W, Jahoor A, Shimizu KK,  
1016 Keller B, Schulze-Lefert P. 2010. Diversity at the Mla powdery mildew resistance locus from  
1017 cultivated barley reveals sites of positive selection. *Mol Plant Microbe Interact* 23:497-509.
- 1018 Sela H, Spiridon LN, Ashkenazi H, Bhullar NK, Brunner S, Petrescu AJ, Fahima T, Keller B,  
1019 Jordan T. 2014. Three-dimensional modeling and diversity analysis reveals distinct AVR  
1020 recognition sites and evolutionary pathways in wild and domesticated wheat Pm3 R genes.  
1021 *Mol Plant Microbe Interact* 27:835-845.
- 1022 Shen QH, Saijo Y, Mauch S, Biskup C, Bieri S, Keller B, Seki H, Ulker B, Somssich IE,  
1023 Schulze-Lefert P. 2007. Nuclear activity of MLA immune receptors links isolate-specific and  
1024 basal disease-resistance responses. *Science* 315:1098-1103.
- 1025 Shen QH, Zhou F, Bieri S, Haizel T, Shirasu K, Schulze-Lefert P. 2003. Recognition  
1026 specificity and RAR1/SGT1 dependence in barley Mla disease resistance genes to the  
1027 powdery mildew fungus. *Plant Cell* 15:732-744.
- 1028 Sievers F, Wilm A, Dineen D, Gibson TJ, Karplus K, Li W, Lopez R, McWilliam H,  
1029 Remmert M, Soding J, et al. 2011. Fast, scalable generation of high-quality protein multiple  
1030 sequence alignments using Clustal Omega. *Mol Syst Biol* 7:539.
- 1031 Srichumpa P, Brunner S, Keller B, Yahiaoui N. 2005. Allelic series of four powdery mildew  
1032 resistance genes at the Pm3 locus in hexaploid bread wheat. *Plant Physiol* 139:885-895.
- 1033 Stahl EA, Dwyer G, Mauricio R, Kreitman M, Bergelson J. 1999. Dynamics of disease  
1034 resistance polymorphism at the Rpm1 locus of *Arabidopsis*. *Nature* 400:667-671.
- 1035 Tameling WI, Vossen JH, Albrecht M, Lengauer T, Berden JA, Haring MA, Cornelissen BJ,  
1036 Takken FL. 2006. Mutations in the NB-ARC domain of I-2 that impair ATP hydrolysis cause  
1037 autoactivation. *Plant Physiol* 140:1233-1245.
- 1038 Tamura K, Peterson D, Peterson N, Stecher G, Nei M, Kumar S. 2011. MEGA5: molecular  
1039 evolutionary genetics analysis using maximum likelihood, evolutionary distance, and  
1040 maximum parsimony methods. *Mol Biol Evol* 28:2731-2739.
- 1041 Tian D, Traw MB, Chen JQ, Kreitman M, Bergelson J. 2003. Fitness costs of R-gene-  
1042 mediated resistance in *Arabidopsis thaliana*. *Nature* 423:74-77.
- 1043 Wang CI, Guncar G, Forwood JK, Teh T, Catanzariti AM, Lawrence GJ, Loughlin FE,  
1044 Mackay JP, Schirra HJ, Anderson PA, et al. 2007. Crystal structures of flax rust avirulence  
1045 proteins AvrL567-A and -D reveal details of the structural basis for flax disease resistance  
1046 specificity. *Plant Cell* 19:2898-2912.
- 1047 Wei F, Gobelmann-Werner K, Morroll SM, Kurth J, Mao L, Wing R, Leister D, Schulze-  
1048 Lefert P, Wise RP. 1999. The Mla (powdery mildew) resistance cluster is associated with



1049 three NBS-LRR gene families and suppressed recombination within a 240-kb DNA interval  
1050 on chromosome 5S (1HS) of barley. *Genetics* 153:1929-1948.  
1051 Wang H. 2005. AB-QTL analysis for two populations of winter barley sharing the donor of  
1052 *Hordeum vulgare* ssp. *spontaneum* (Doctoral dissertation, University of Bonn, Bonn,  
1053 Germany). <http://hss.ulb.uni-bonn.de/2005/0547/0547.pdf>  
1054 Wei F, Wing RA, Wise RP. 2002. Genome dynamics and evolution of the Mla (powdery  
1055 mildew) resistance locus in barley. *Plant Cell* 14:1903-1917.  
1056 Zhou F, Kurth J, Wei F, Elliott C, Vale G, Yahiaoui N, Keller B, Somerville S, Wise R,  
1057 Schulze-Lefert P. 2001. Cell-autonomous expression of barley Mla1 confers race-specific  
1058 resistance to the powdery mildew fungus via a Rar1-independent signaling pathway. *Plant*  
1059 *Cell* 13:337-350.  
1060 Zhu M, Jiang L, Bai B, Zhao W, Chen X, Li J, Liu Y, Chen Z, Wang B, Wang C, et al. 2017.  
1061 The Intracellular Immune Receptor Sw-5b Confers Broad-Spectrum Resistance to  
1062 Tospoviruses through Recognition of a Conserved 21-Amino Acid Viral Effector Epitope.  
1063 *Plant Cell* 29:2214-2232.  
1064



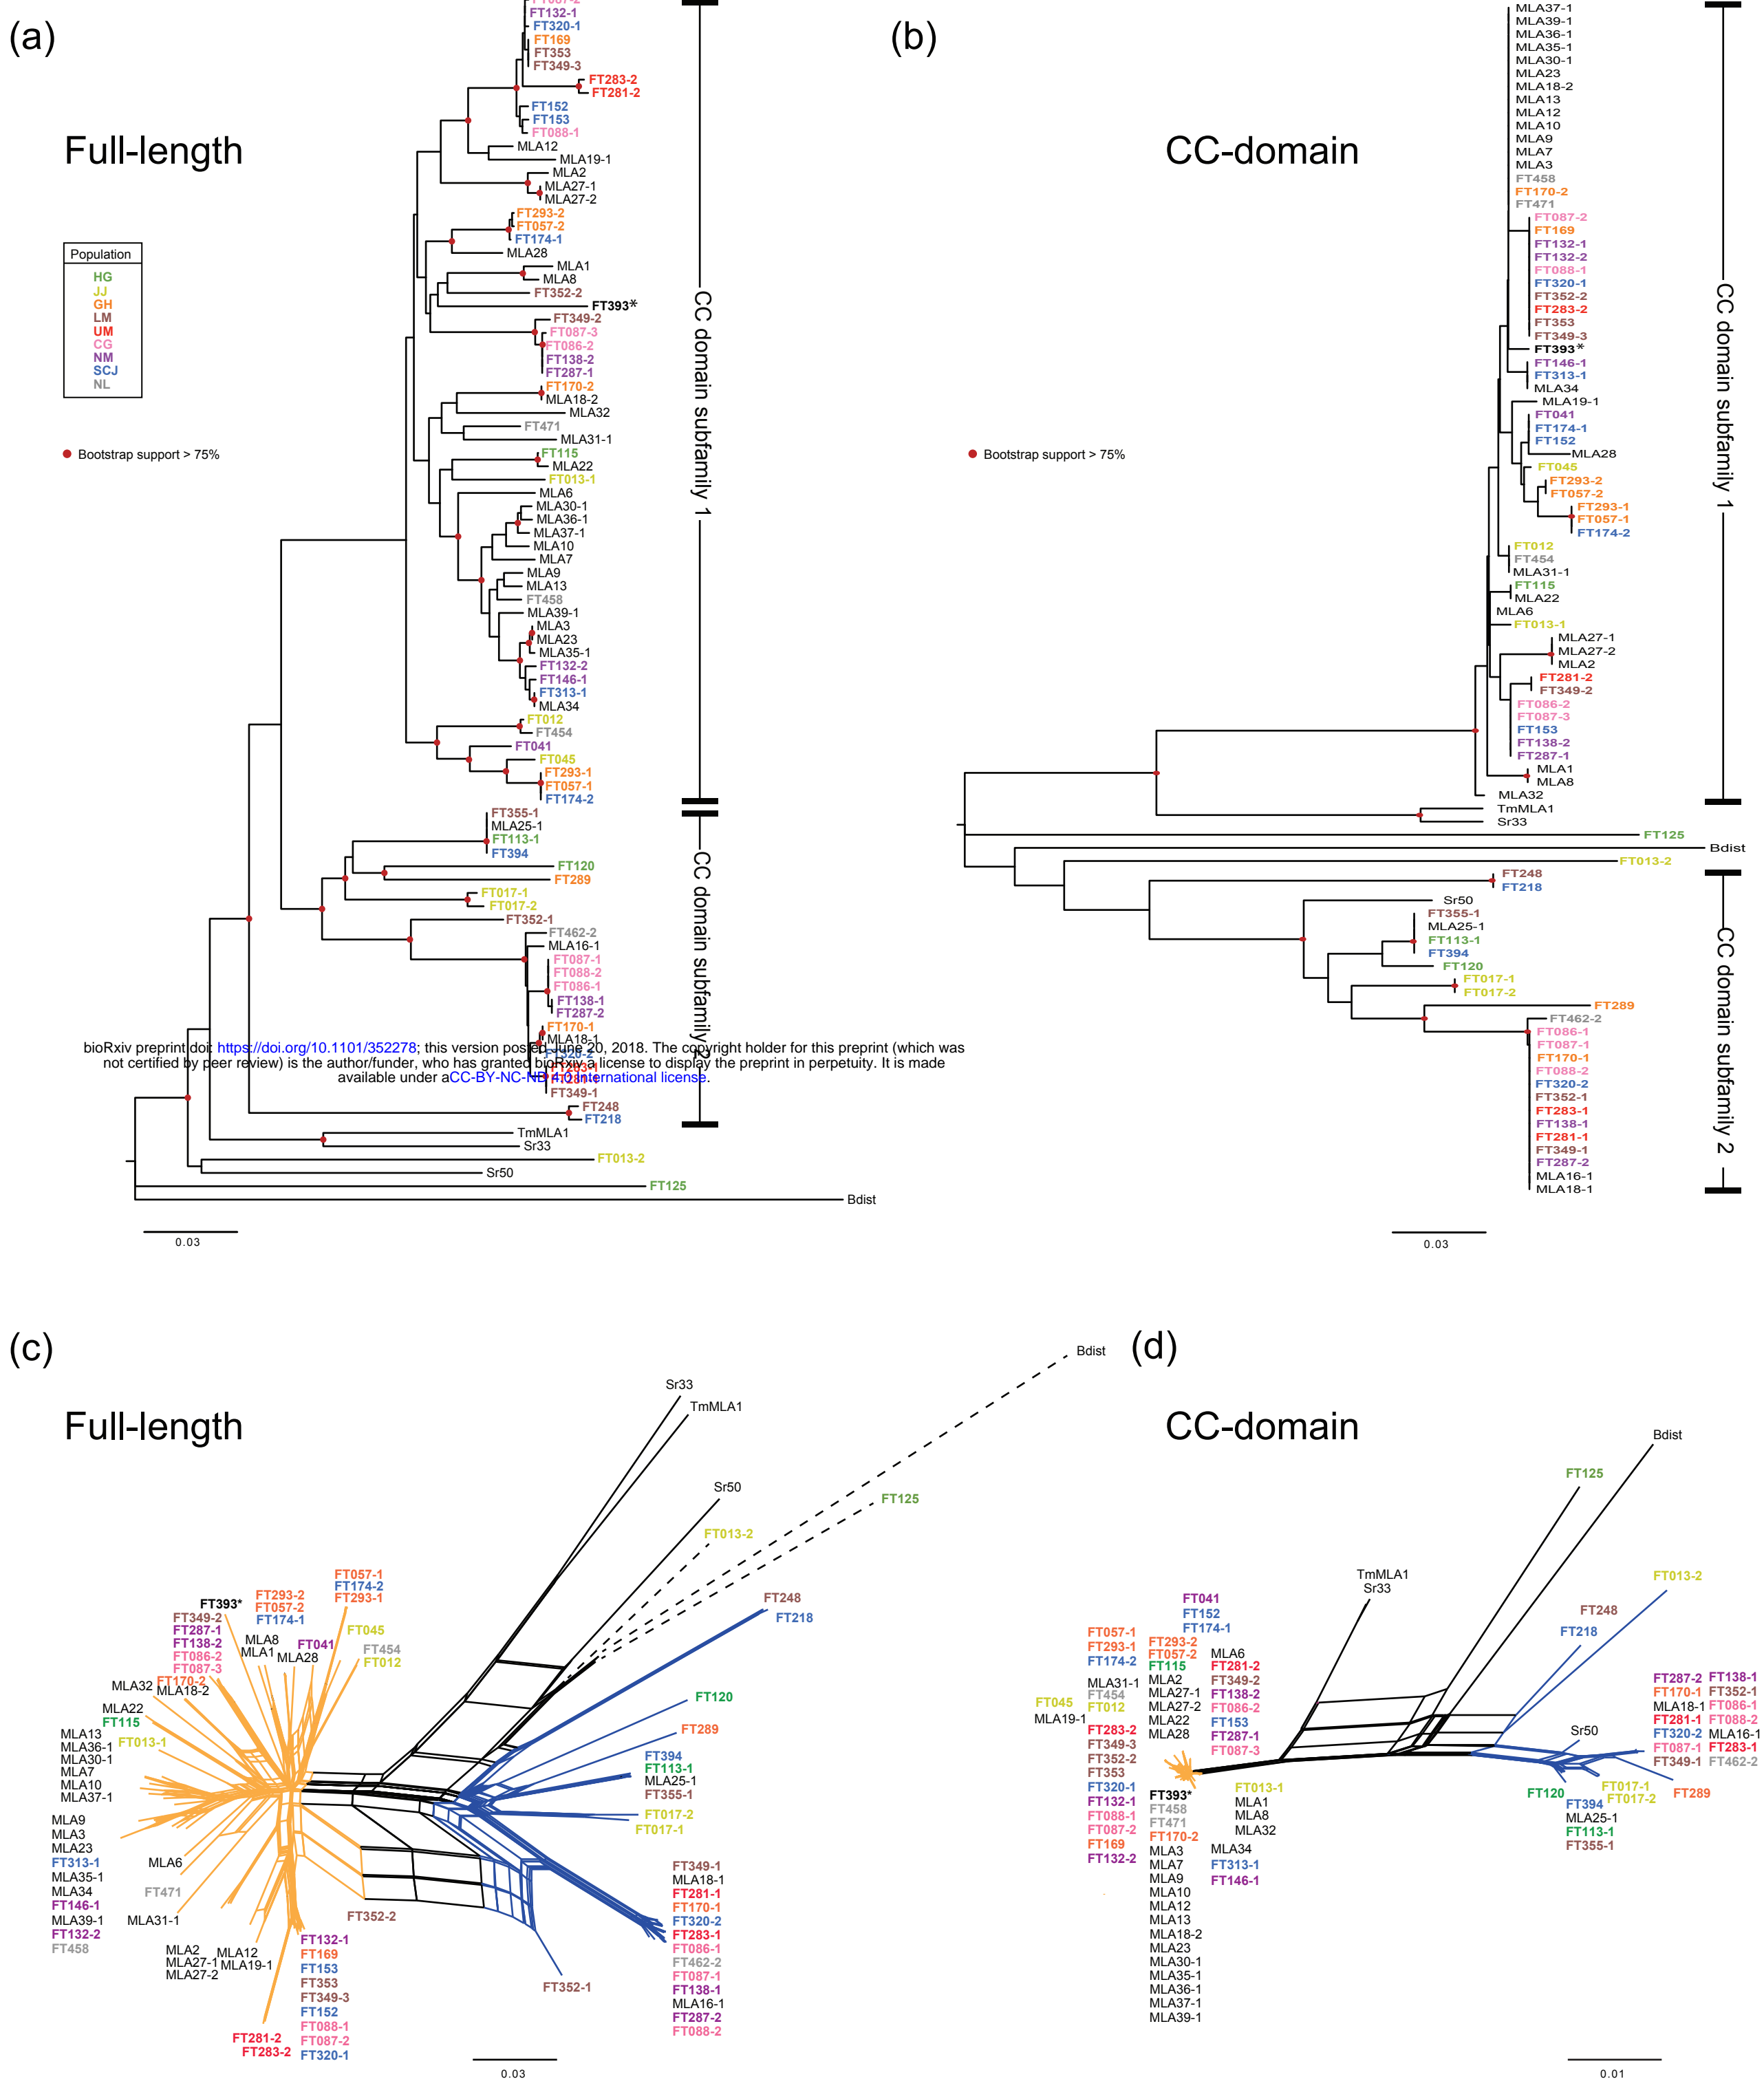

**Fig. 1: Phylogenetic analysis of 91 MLA and MLA-like protein sequences.** (a) The unrooted neighbor-joining (NJ) trees analysis and (c) neighbor-net analysis of full-length proteins. (b) NJ tree analysis and (d) neighbor-net analysis of the CC (coiled-coil) domain (AA 1-151). These analyses were conducted using 28 previously published MLA protein sequences from barley (indicated in black) (Seeholzer et al, 2010), four MLA homologs from other species (indicated in black), and 59 candidate MLA sequences identified in this study from 50 wild barley accessions (colored by population of origin). Only MLA sequences harboring all three domains with more than 895 AA were used in this analysis. (a and b) Red circles mark branches with bootstrap support > 0.75 (500 bootstrap replicates). (c and d) The proteins sequences indicated by orange and blue edges are separately grouped with bootstrap support > 0.95 (1000 bootstrap replicates). The branch length of dashed lines is reduced to half of the actual length. (e) Number of haplotypes of the CC, NB-ARC domains and LRR of 87 barley MLA sequences found in this and previous studies. No *Bgh* resistance activity was detected for MLA16-1, MLA18-1, and MLA25-1 (Seeholzer, et al. 2010, Jordan, et al, 2011). \*The population information of FT393 is unavailable.

Number of haplotypes of 87 MLA sequences

| CC | NB-ARC | LRR |                  |
|----|--------|-----|------------------|
| 27 | 44     | 67  | at 100% identity |
| 7  | 10     | 48  | at 95% identity  |

(a)

## NB-ARC domain

| Population |
|------------|
| HG         |
| JJ         |
| GH         |
| LM         |
| UM         |
| CG         |
| NM         |
| SCJ        |
| NL         |

- ◀ CC domain subfamily 2  
 ● Bootstrap support > 75%

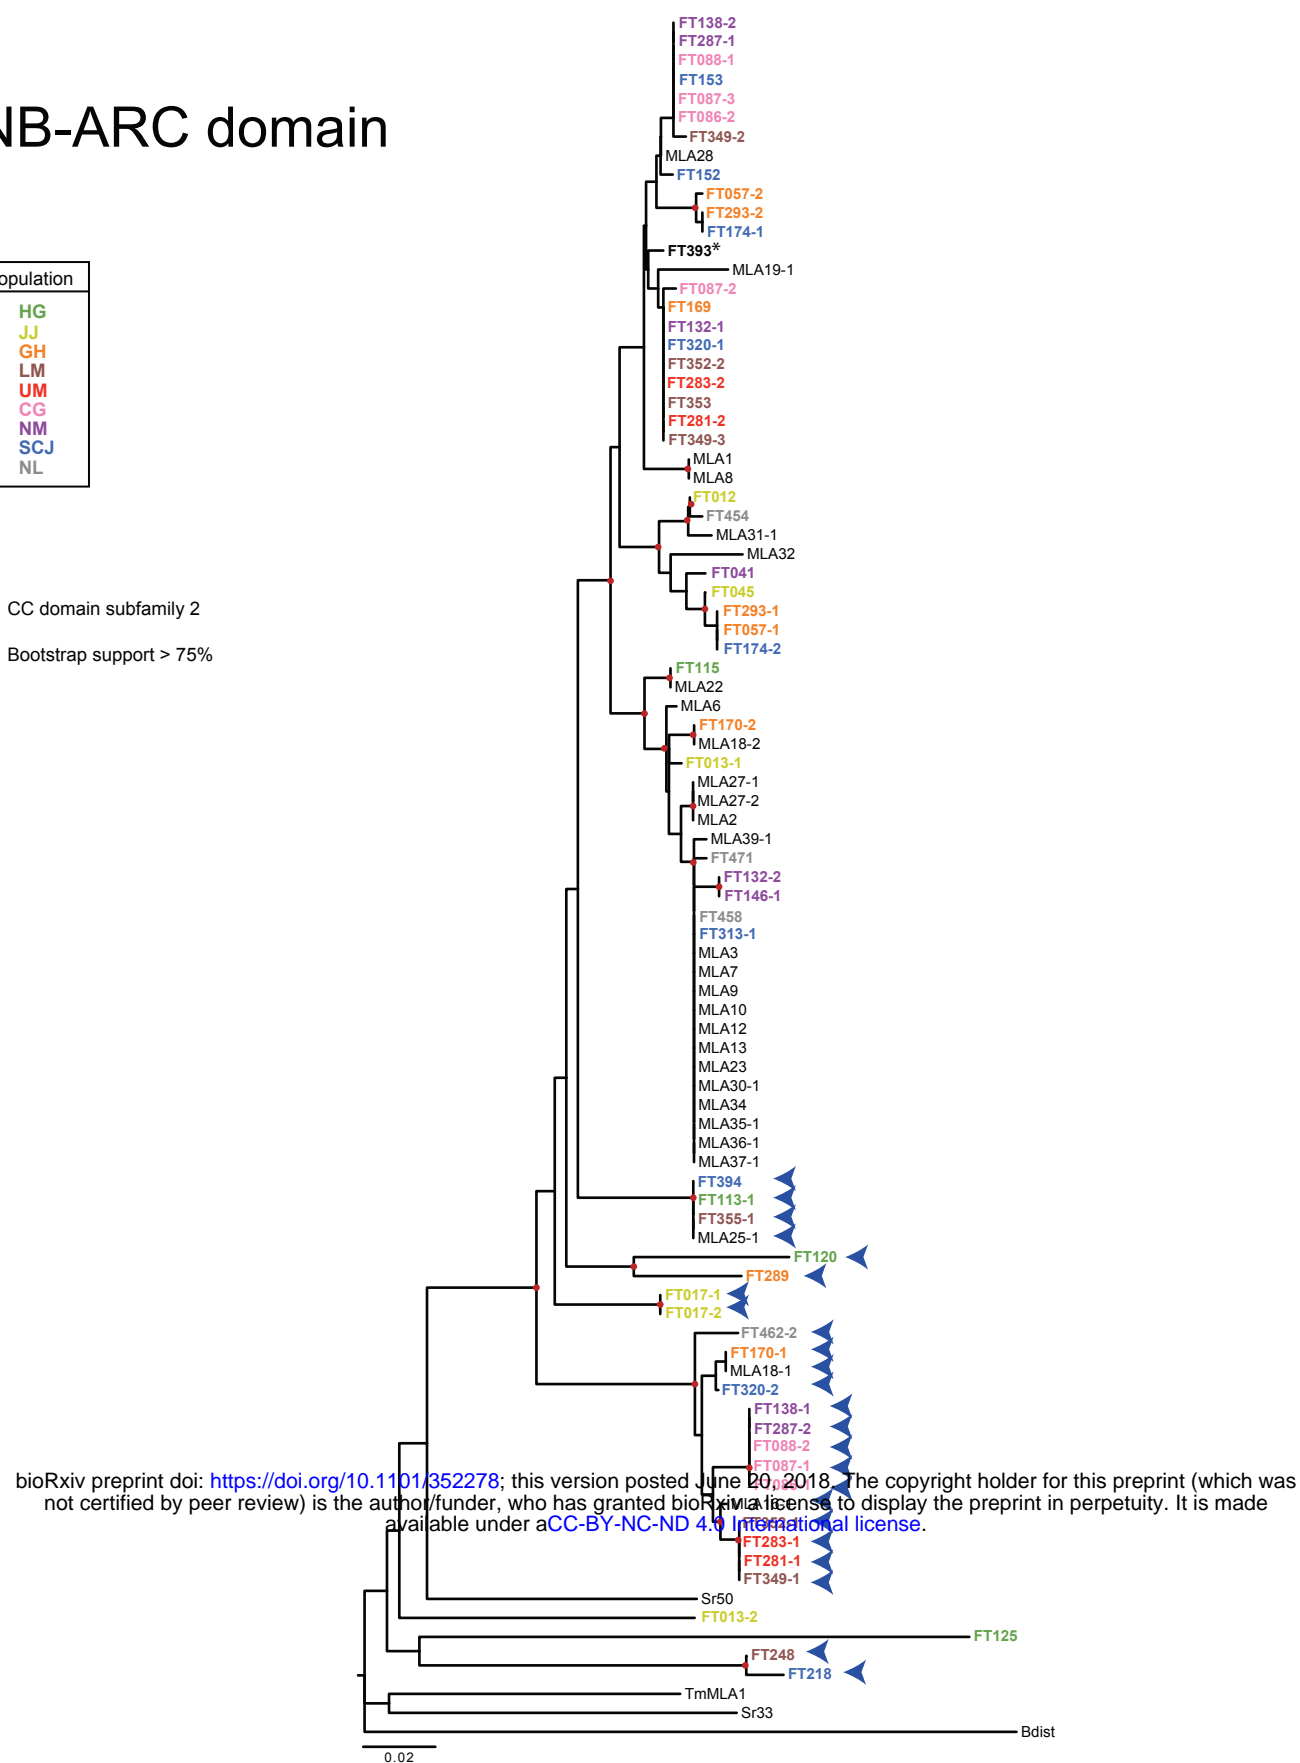

(b)

## LRR

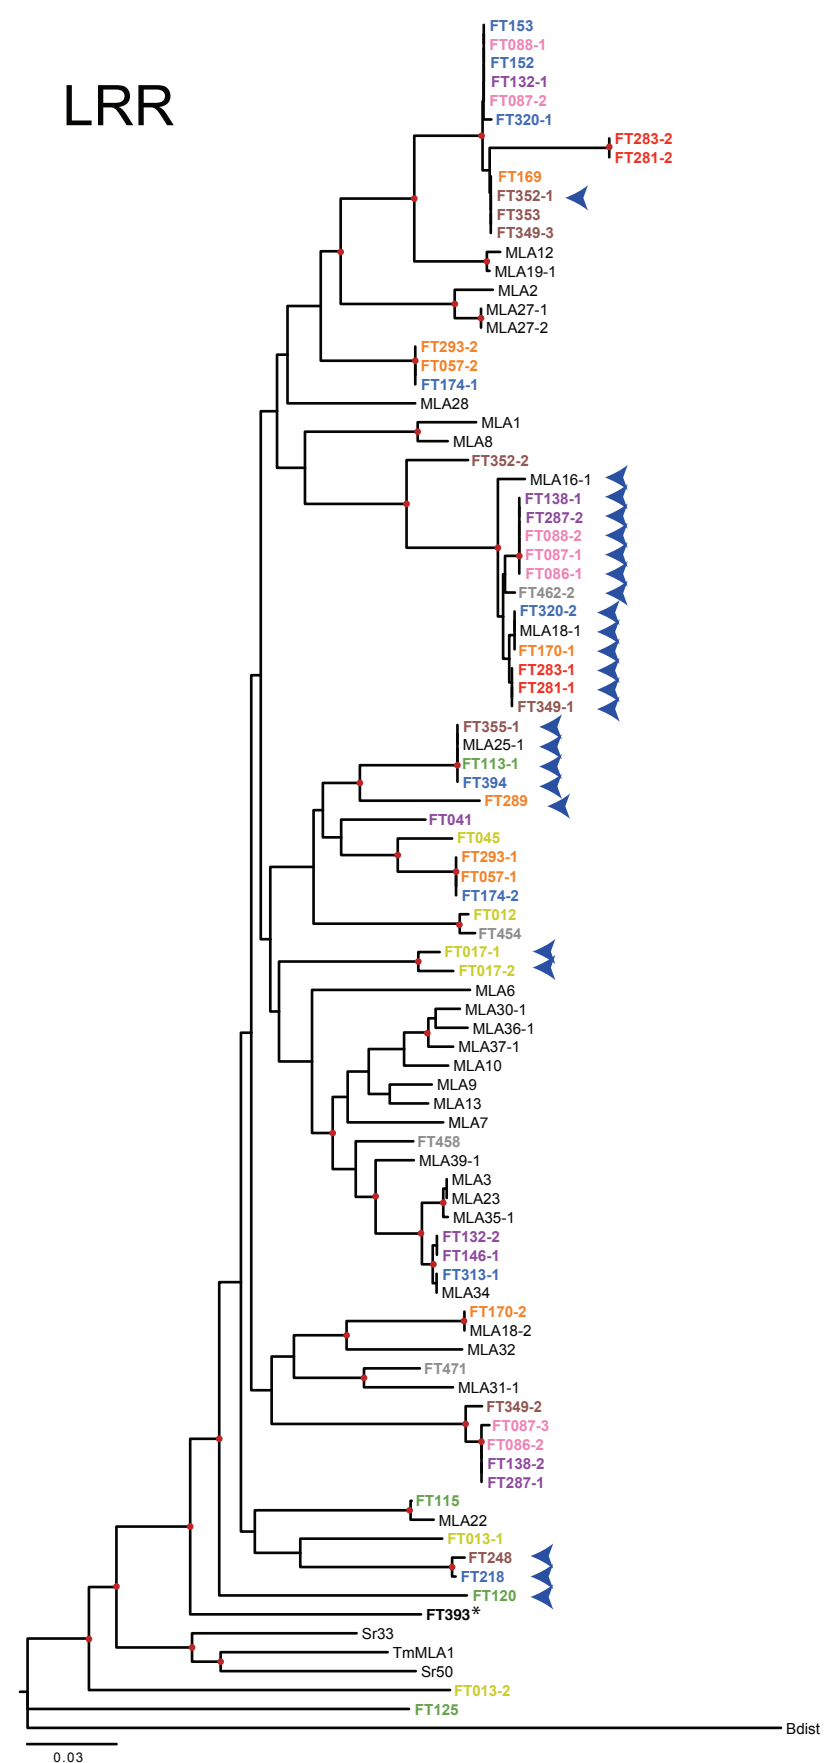

(c)

## NB-ARC domain

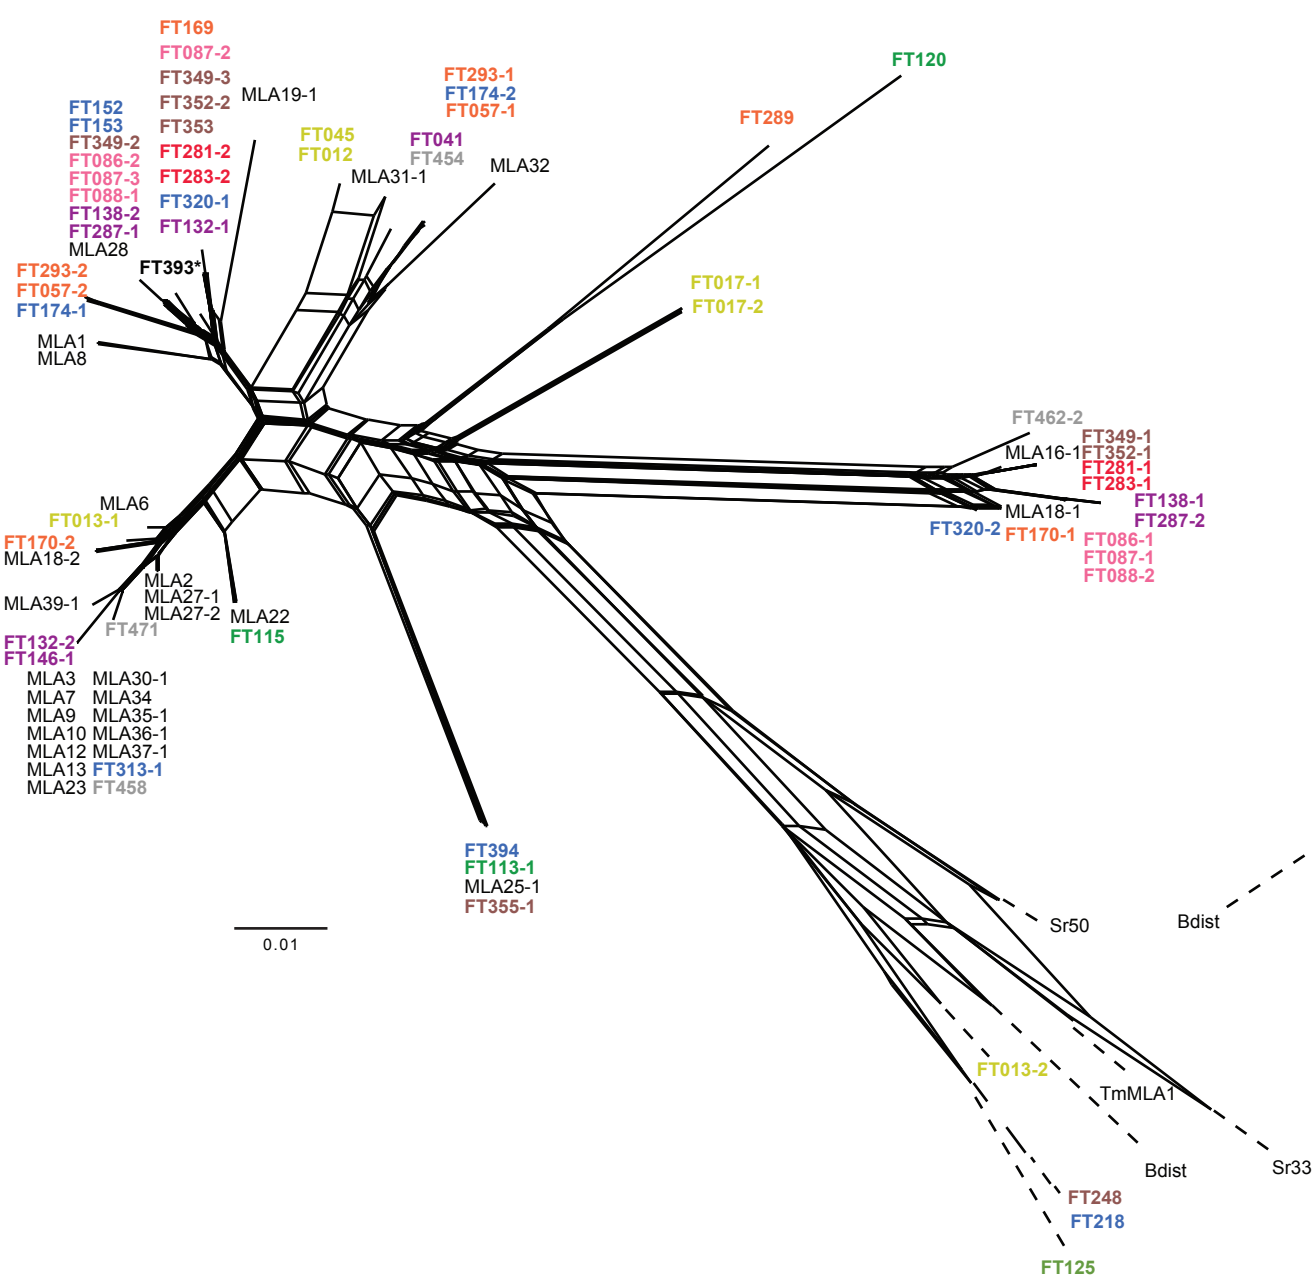

(d)

## LRR

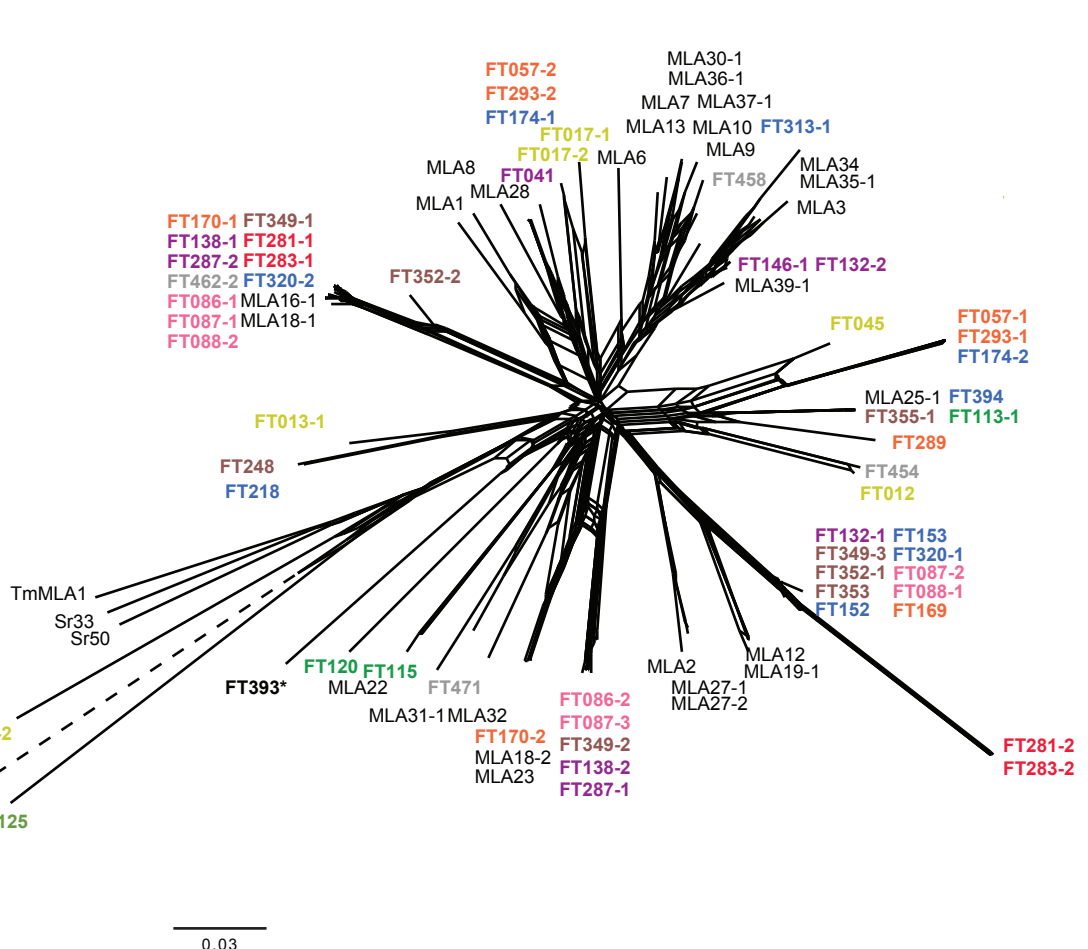

**Fig. 2: Phylogenetic analysis of the MLA protein domains.** (a) NJ tree analysis and (c) neighbor-net analysis of the MLA NB-ARC (nucleotide-binding adaptor shared by APAF-1, R proteins, and CED-4) domain (AA 180–481). (b) NJ tree analysis and (d) neighbor-net analysis of the MLA LRR (leucine-rich repeat region) (AA 1490–end). These analyses were conducted using 28 previously published MLA protein sequences from barley (indicated in black) (Seeholzer, et al. 2010), four sequences of MLA homologs in other species (indicated in black), and 59 candidate MLA sequences that were identified in this study from 50 wild barley accessions (colored by population of origin). Only MLA sequences harboring all three domains with more than 895 AA were used in this analysis. Red circles mark branches with bootstrap support > 0.75 (500 bootstrap replicates). Blue arrowheads indicate members of CC domain subfamily 2 shown in Fig. 1. The branch length of dashed lines (c) and (d) is reduced to 10% and half of the actual length, respectively. \*The population information of FT393 is unavailable.

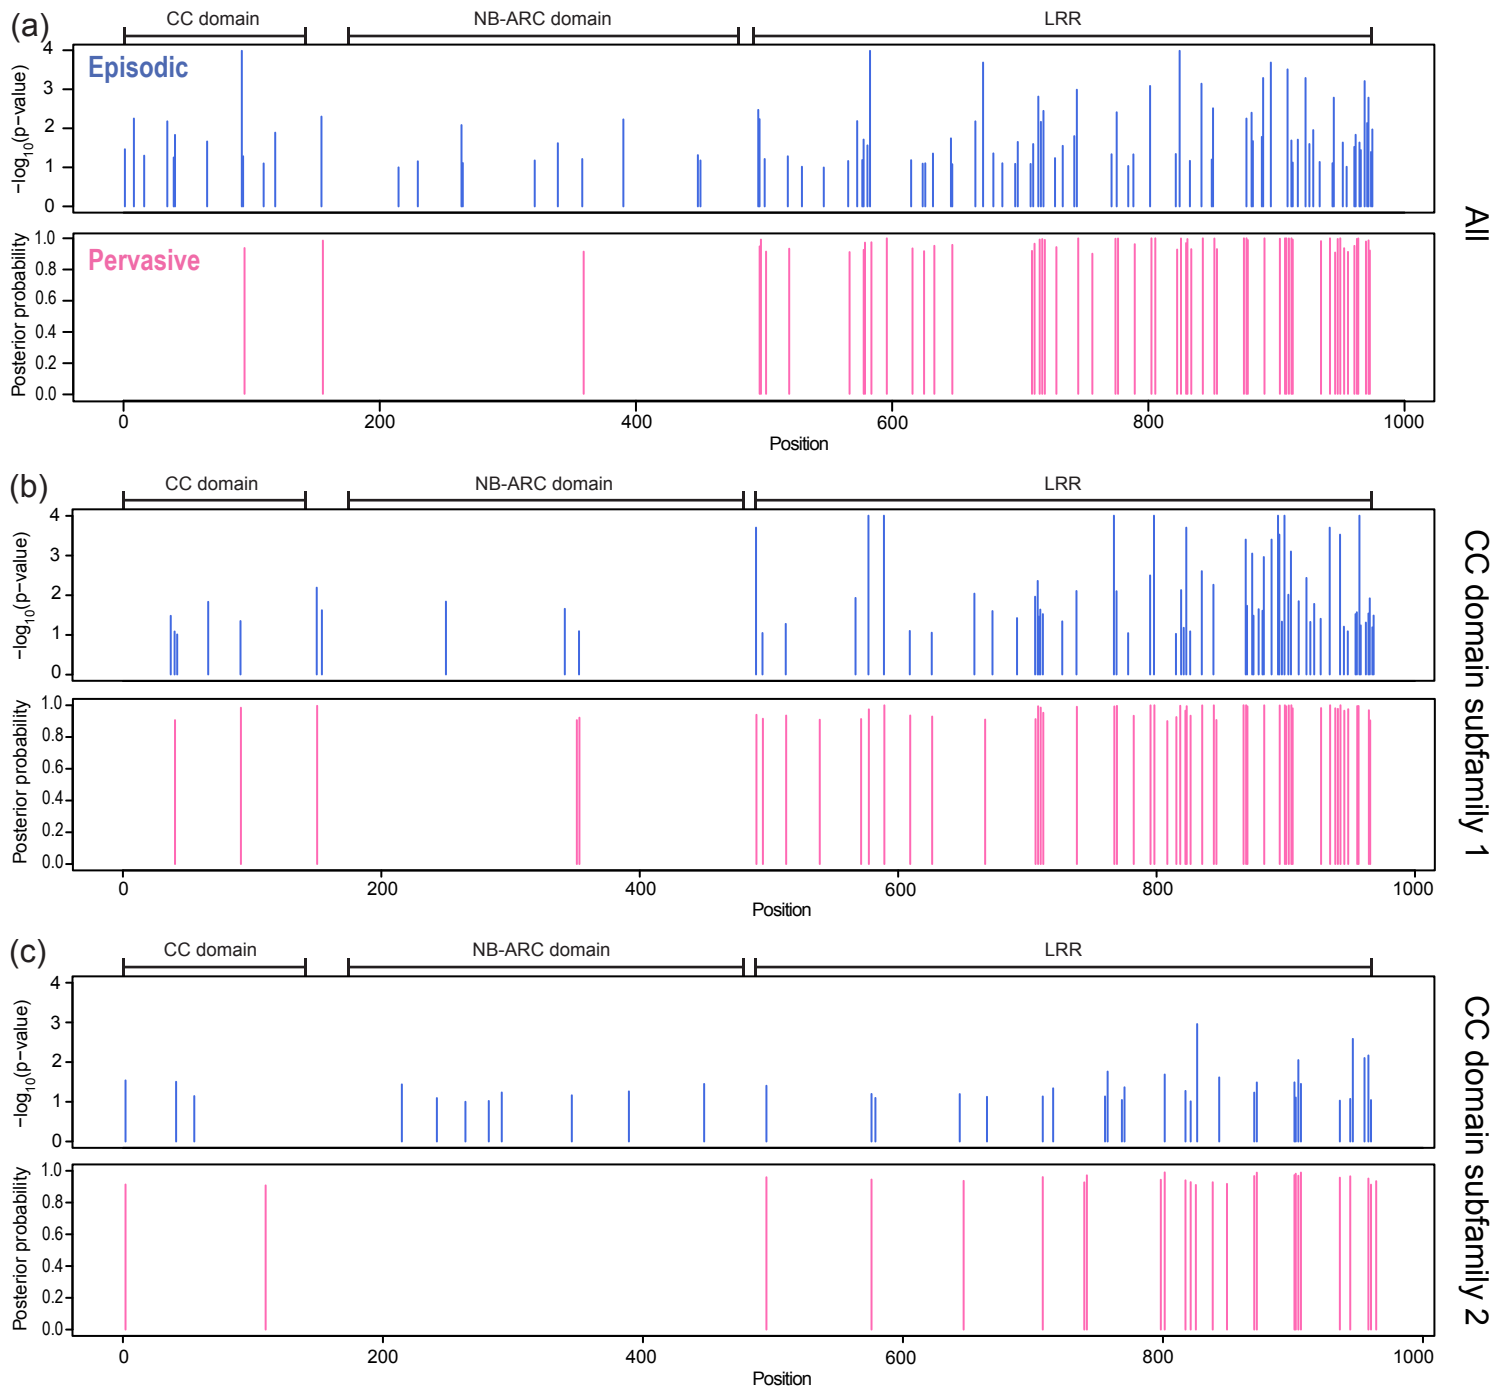

**Fig. 3: Identification of positively selected sites in previously known and newly identified candidate MLA cDNAs.** (a) Sites under episodic (upper panel; blue bars) or pervasive (lower panel: pink bars) positive selection in a set of 85 known and newly identified MLA cDNAs. (b) Sites under episodic (upper panel; blue bars) or pervasive (lower panel: pink bars) positive selection in 61 known and newly identified MLAs carrying a CC domain belonging to subfamily 1. (c) Sites under episodic (upper panel; blue bars) or pervasive (lower panel: pink bars) positive selection in 24 known and newly identified MLAs carrying a CC domain belonging to subfamily 2. Only full-length MLA sequences (at least 895 AA) from barley were included in these analyses. To test for episodic selection, we used MEME and judged all sites with a p value below 0.1 to be under positive selection. To test for pervasive selection, we additionally used FUBAR and judged all sites with a posterior probability above 0.95 to be under positive selection. AA 1–151: CC domain; AA 180–481: NB-ARC domain; AA 490–end: LRR.

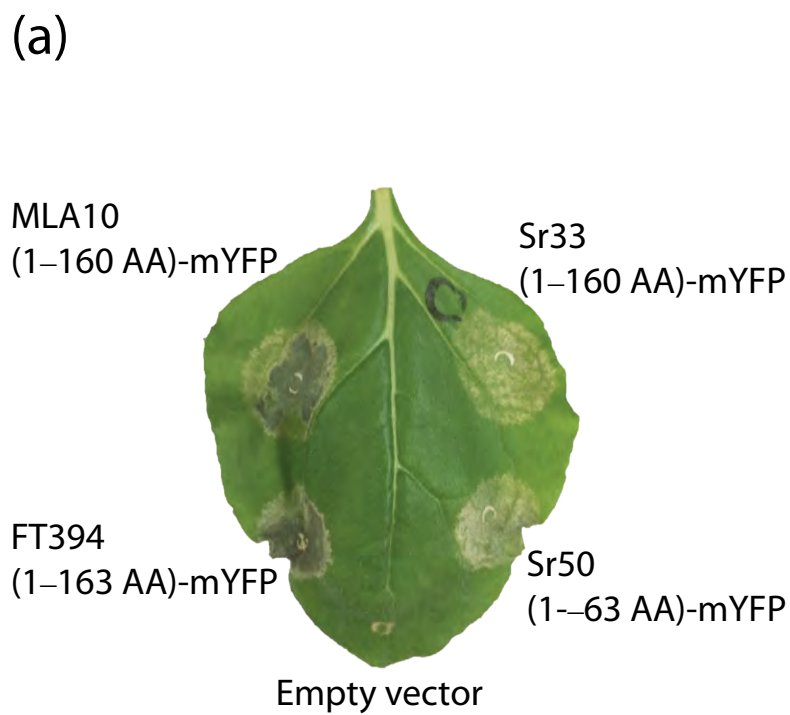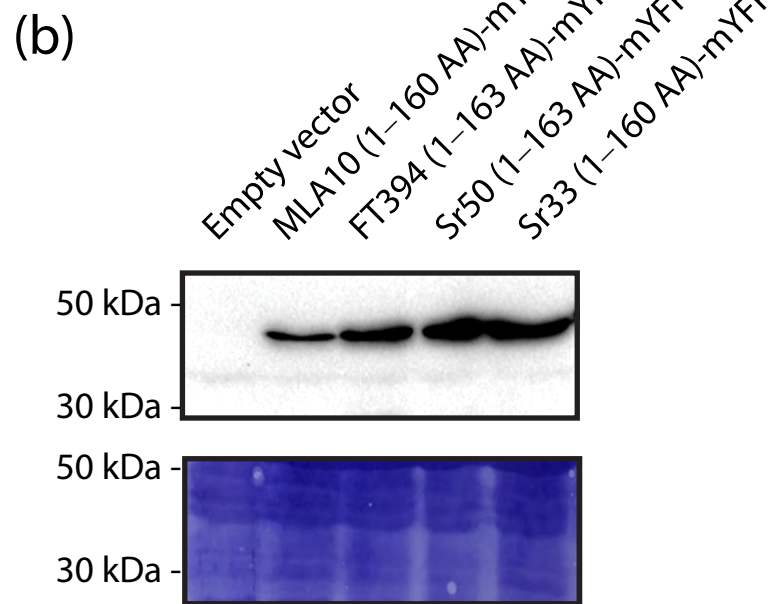

**Fig. 4: CC domains of subfamily 2 MLA FT394 exhibits cell death activity.** (a) *Nicotiana benthamiana* plants were transiently transformed to express the CC domains of MLA10\_1-160 amino acids (AA), FT394\_1-163AA, Sr50\_1-163AA, and Sr33\_1-160AA, each fused C-terminally to monomeric YFP, or empty vector control; the picture was taken three days post infiltration. (b) Immunoblot analysis corresponding to (a). Transformed leaf tissue was harvested 24 hours post infiltration. Proteins were analyzed after gel electrophoresis and western blotting with an anti-GFP antibody.



(a)

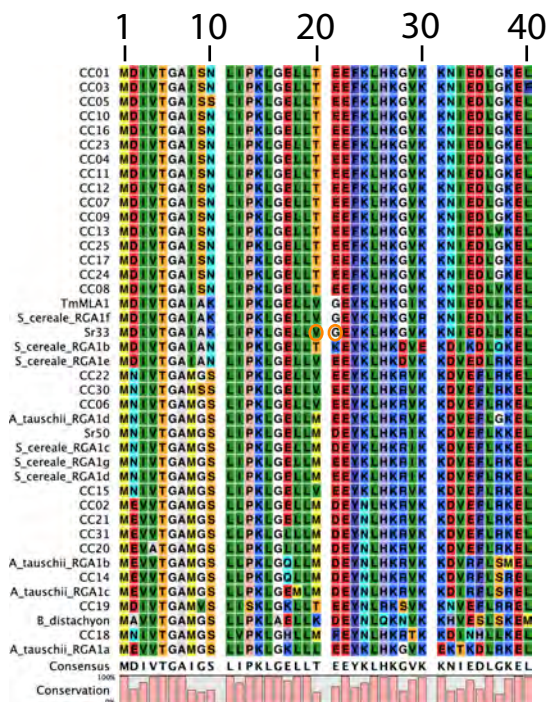

(b)

MLA10 (5-120 aa)

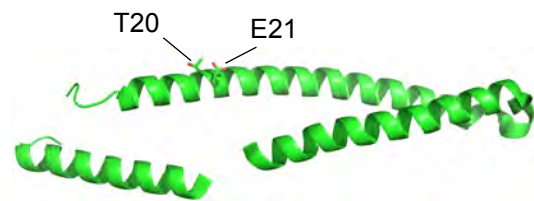

Sr33 (6-120 aa)

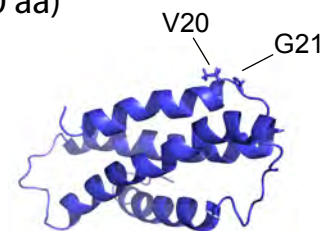

(c)

(d)

MLA10  
(1-160 AA)-mYFP

MLA10 (T20V, E21G)  
(1-160 AA)-mYFP

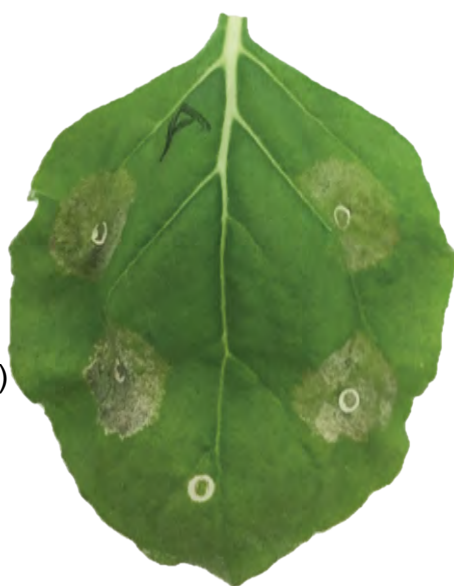

Empty vector

Sr33  
(1-160 AA)-mYFP

Sr33 (V20T, G21E)  
(1-160 AA)-mYFP

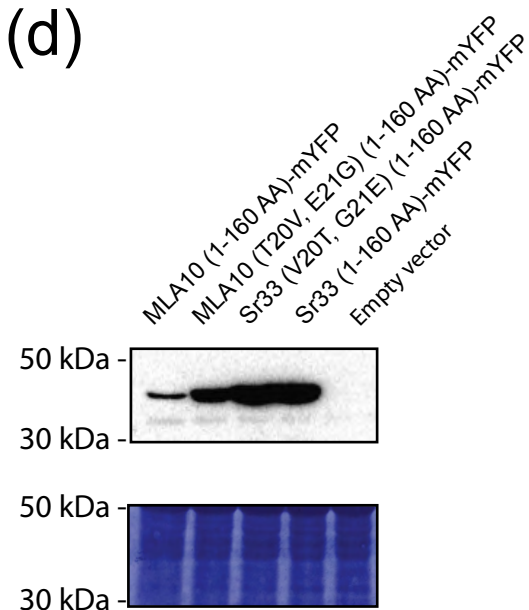

**Fig. 5. Sr33 carries unique amino acid substitutions in a loop region of the coiled-coil (CC) domain.**

(a) Amino acid sequence alignment of the CC variants (1–40 amino acids (AA), see Table S3b) of MLA and MLA orthologs. The unique residues in the Sr33 CC domain are indicated by orange circles. (b) The solved tertiary protein structures of MLA10 (PDB ID 3QFL) and Sr33 (PDB ID 2NCG) CC domains. A protomer of the CC domain dimer of MLA10 is shown. (c) The unique amino acids do not contribute to the intensity of cell death in *Nicotiana benthamiana*. *N. benthamiana* plants were transiently transformed to express the CC domains of MLA10<sub>1-160AA</sub>, MLA10<sub>1-160AA</sub> (T20V, E21G), Sr33<sub>1-160AA</sub>, and Sr33<sub>1-160AA</sub>(V20T, G20E) each fused C-terminally to monomeric YFP, or EV and a picture was taken three days post infiltration. (d) Immunoblot analysis corresponding to (c). Transformed leaf tissue was harvested 24 hours post infiltration. Proteins were analyzed after gel electrophoresis and western blotting with an anti-GFP antibody.

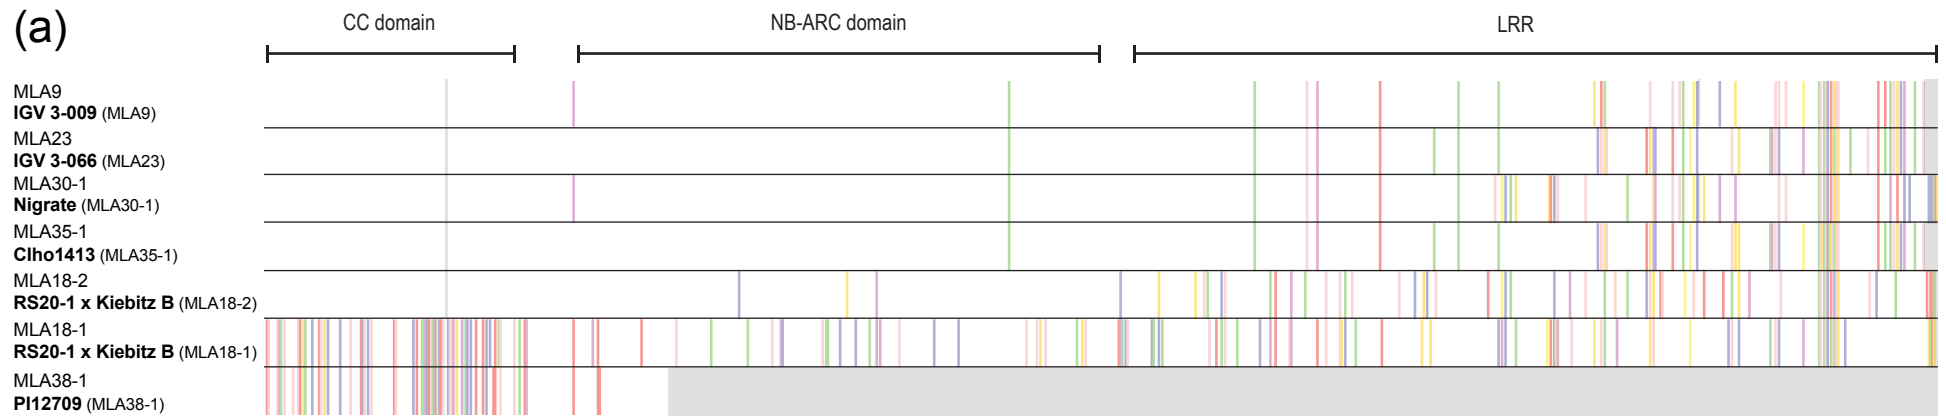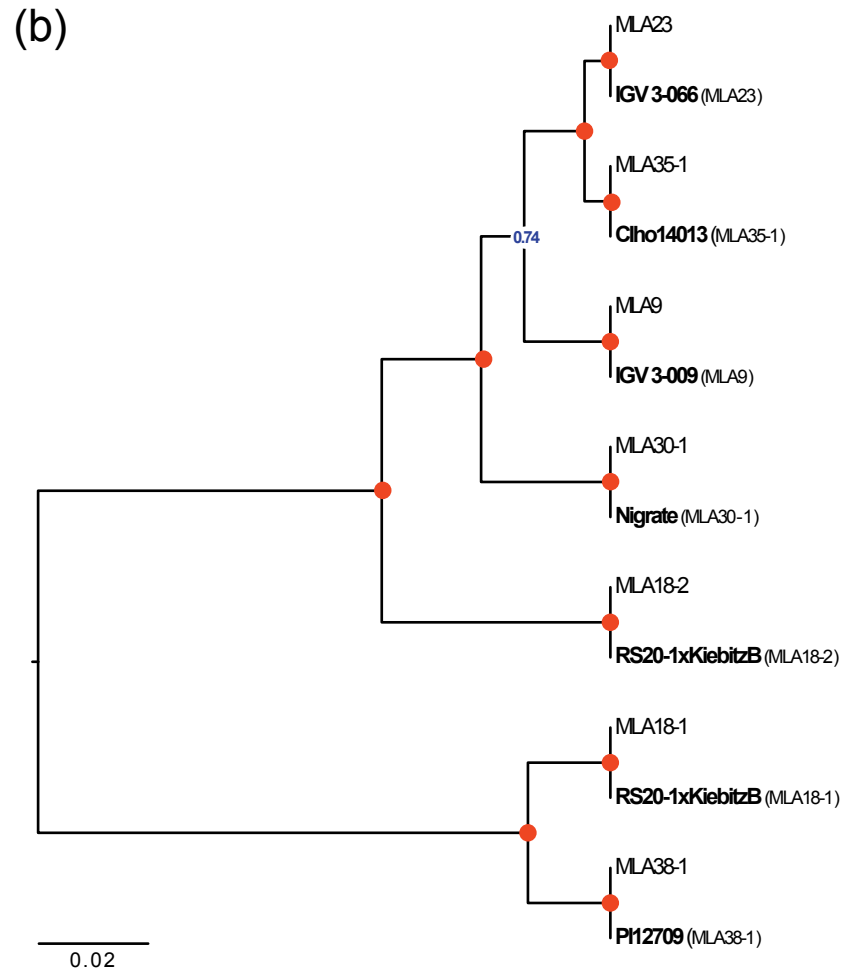

**Fig. S1: Validation of MLA identification workflow through recovery of known MLA sequences.** (a) Amino acid (AA) sequence alignment of seven known MLA alleles and the corresponding sequences as obtained by our recovery workflow starting from RNA-sequencing data of the indicated barley lines. For visualization, an AA consensus sequence was obtained from 28 previously published full-length barley MLA sequences (Seeholzer, et al. 2010) and for each MLA polymorphic residues relative to this consensus are highlighted in color (gray color indicates alignment gaps). The three domains of MLA are indicated at the top. (b) Unweighted Pair Group Method with Arithmetic mean tree analysis of the 14 MLA sequences. Tree calculation was performed using the pairwise deletion option. Red circles mark branches with a bootstrap support of 1 (1,000 bootstrap replicates).



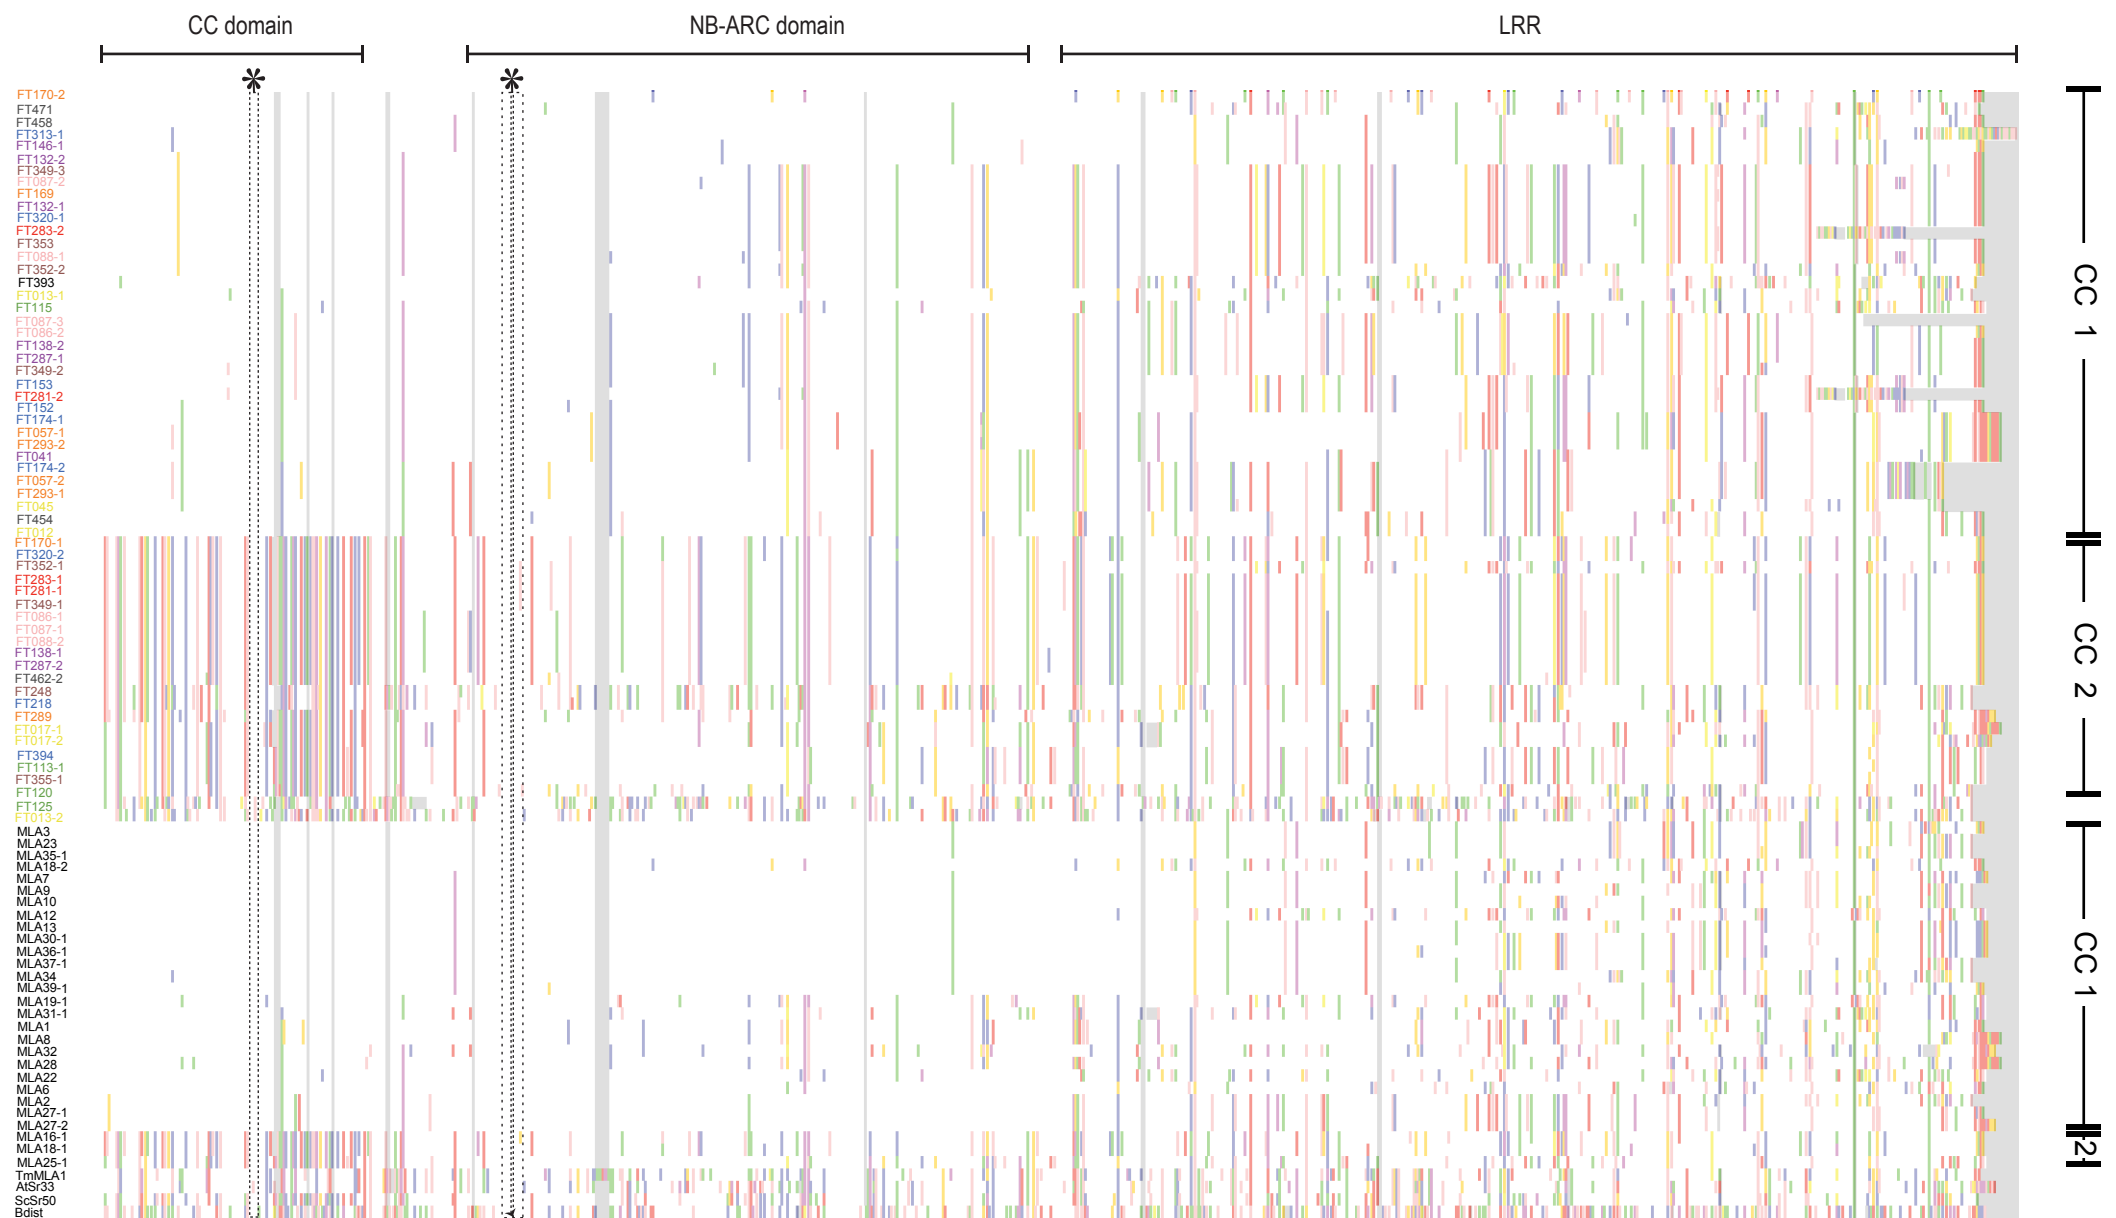

**Fig. S2: Amino acid (AA) sequence alignment of 91 full-length MLA protein sequences.** The AA alignment includes full-length sequences of 28 previously published MLA protein sequences from barley (indicated in black) (Seeholzer et al, 2010), four MLA homologs from other species (indicated in black), and 59 candidate MLA sequences identified in this study from 50 wild barley accessions (colored by population of origin). For visualization, an AA consensus sequence was obtained from the 28 previously published barley MLA sequences and polymorphic residues in each MLA relative to this consensus are highlighted in color (gray color indicates alignment gaps).

The three domains of MLA are indicated at the top. Asterisks mark the EDVID motif (Rairdan, et al. 2008) in the coiled-coil (CC) domain and the Walker A motif (Tamelung, et al. 2006) with the p-loop in the nucleotide-binding (NB) domain.

Only full-length MLA sequences (at least 895 AA) were included in this analysis.

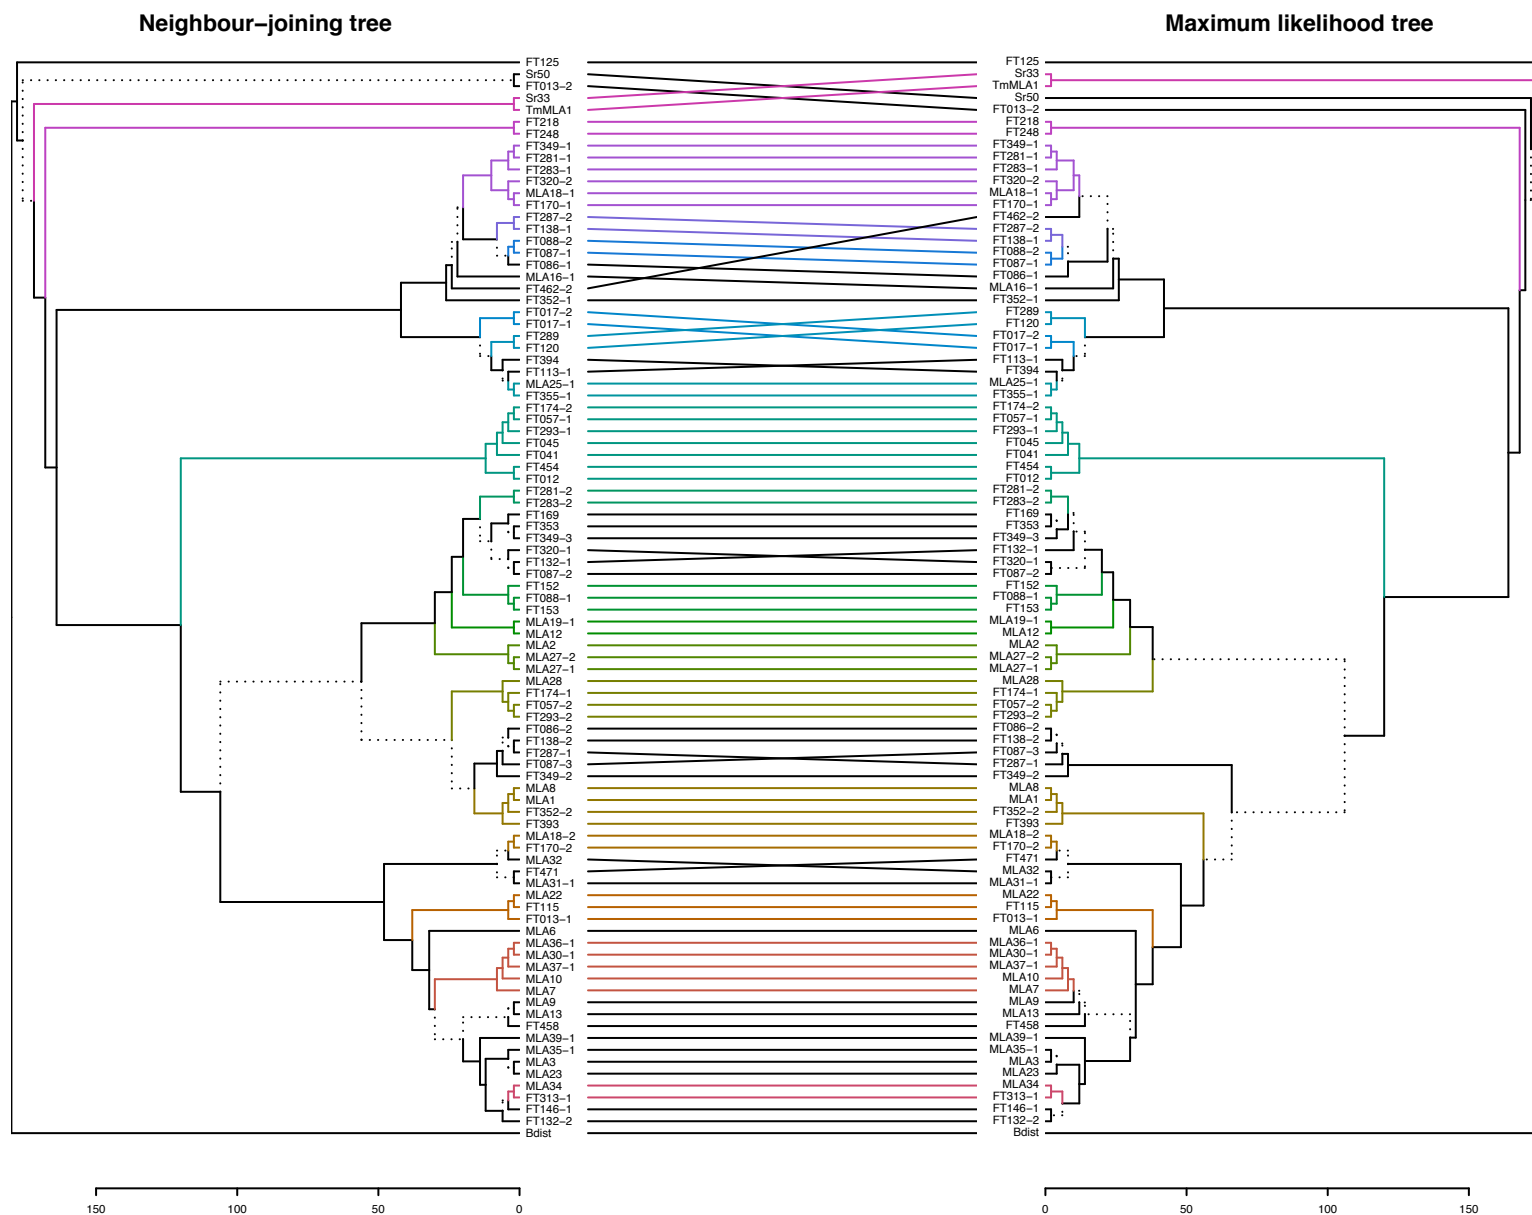

**Fig. S3: Comparison of neighbor-joining (NJ) and maximum-likelihood (ML) trees obtained from 91 full-length MLA protein sequences.** Trees include full-length amino acid (AA) sequences of 28 previously published MLAs from barley (Seeholzer, et al. 2010), four MLA homologs from other species, and 59 candidate MLA sequences identified in this study from 50 wild barley accessions. All positions containing gaps or missing data were omitted from the tree calculations (complete deletion option). A tanglegram was created from the two trees using the R package ‘dendextend’, in which lines connect the same isolates and colors represent sub-trees conserved between the two methods. Branches shown as dashed lines indicate differences between the trees.

(a)

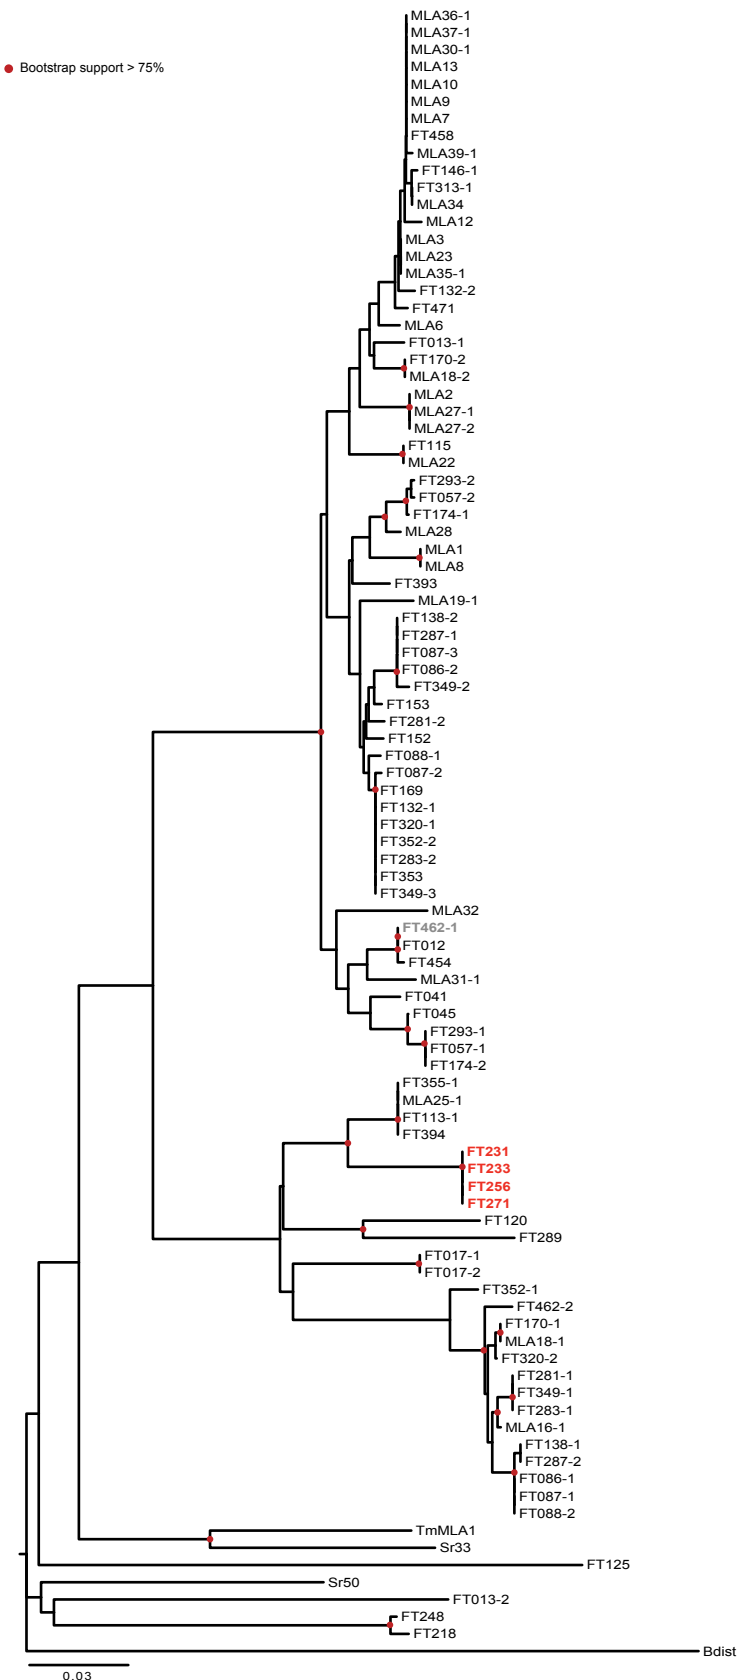

(b)

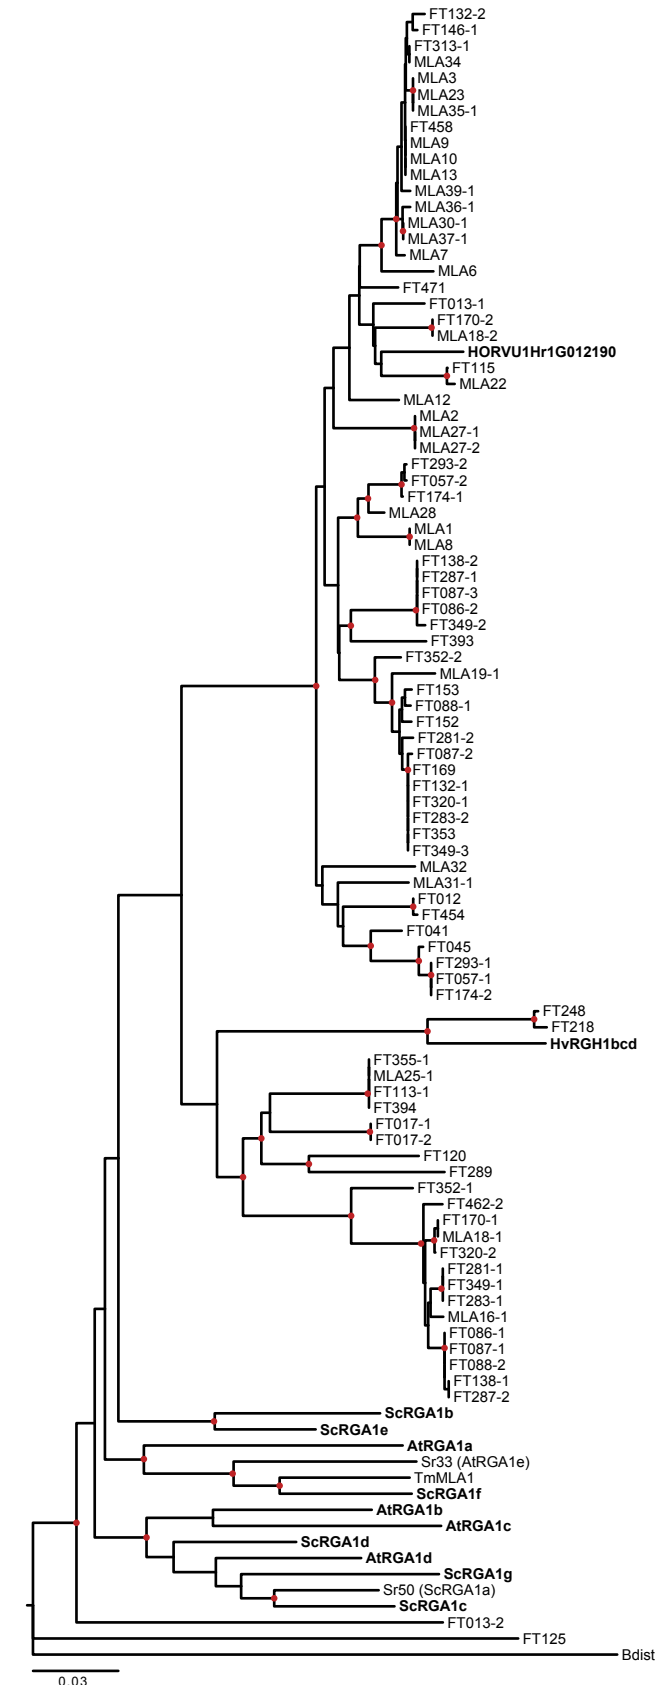

**Fig. S4: Neighbor-joining (NJ) tree analyses including additional full-length MLA protein sequences.**

(a) The unrooted NJ tree includes the same 91 amino acid (AA) sequences as shown in Fig. 1 plus five additional MLA candidate sequences found in the wild barley accessions. These sequences contain a premature stop at positions 631 (grey) and 561 (red), respectively. (b) The unrooted NJ tree includes the same 91 AA sequences as shown in Fig. 1 plus the sequences of two additional MLA homologs from barley cv. Morex (RGH1bcd and a 2<sup>nd</sup> candidate extracted from the most recent Morex assembly) and several additional RGH1 homologs from *Secale cereale* (six sequences) and *Aegilops tauschii* (four sequences). Additional sequences not included in Fig. 1 are highlighted in bold. For tree calculation, all positions containing gaps or missing data were omitted (complete deletion option). Red circles mark branches with bootstrap support > 0.75 (500 bootstrap replicates).

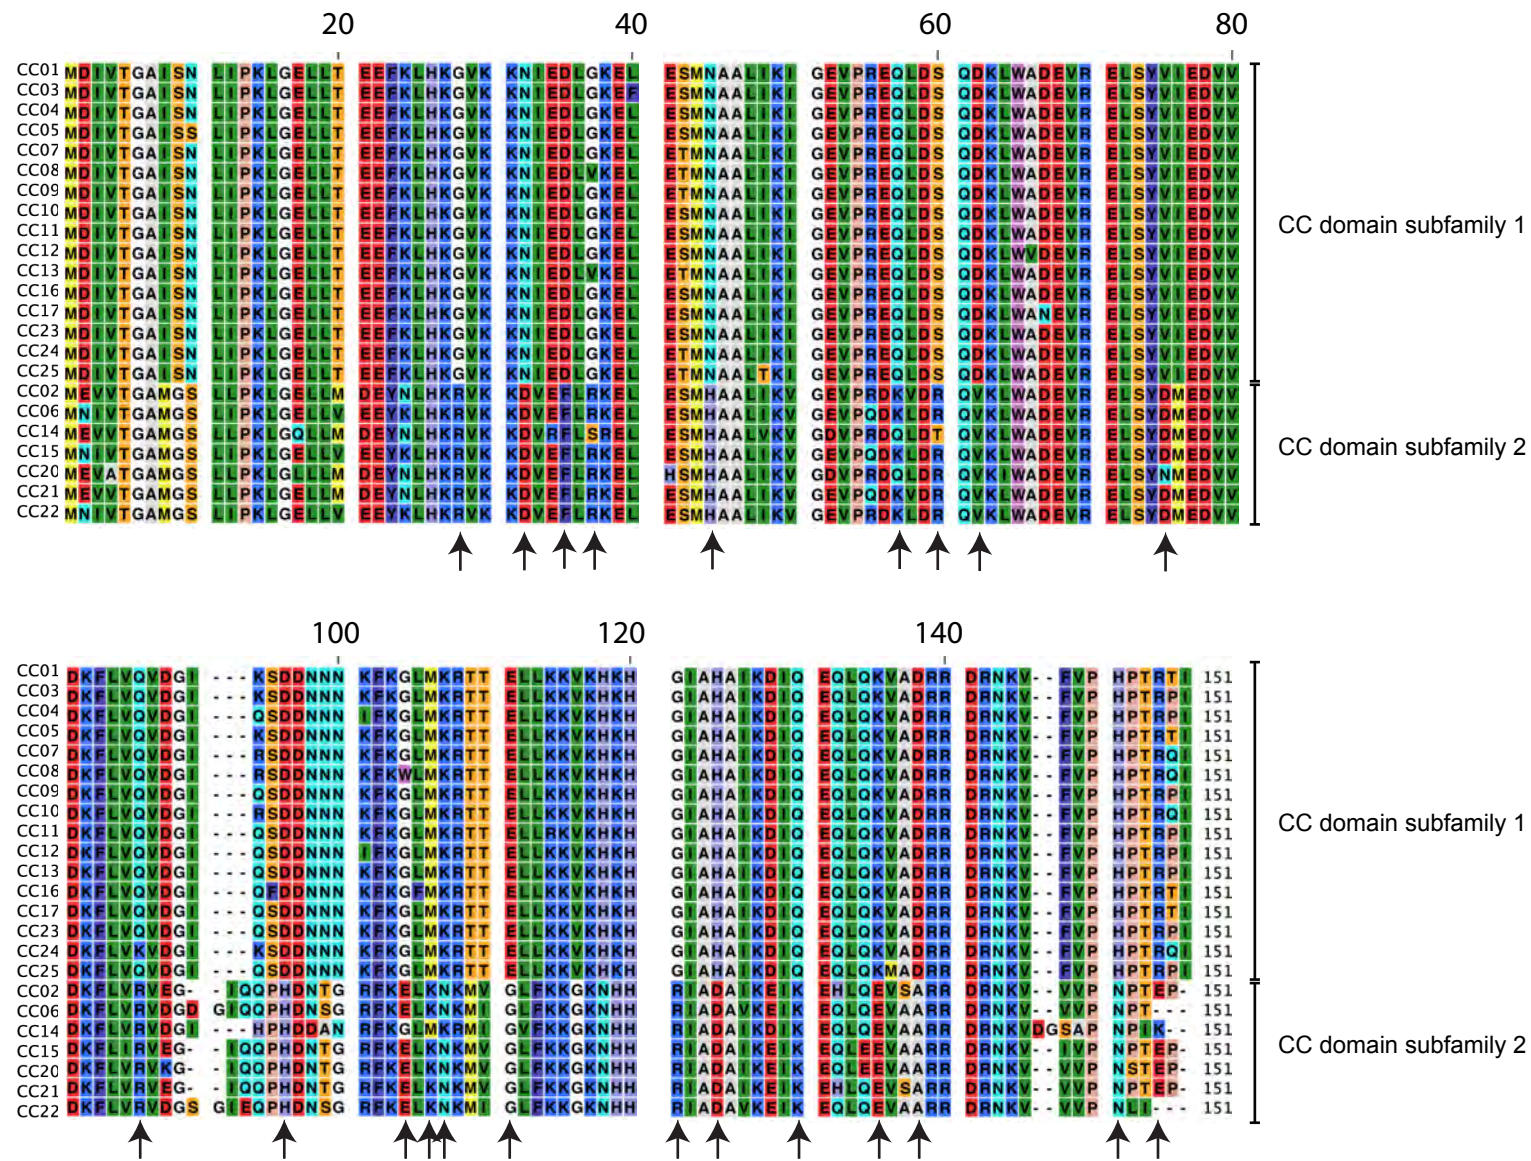

**Fig. S5: Amino acid sequence alignment of the CC domain haplotypes representing subfamily 1 or subfamily 2 MLA proteins.**

The alignment shows 22 residues that are differentially occupied by charged or non-charged amino acids in subfamilies 1 and 2 (indicated by arrows).



(a)

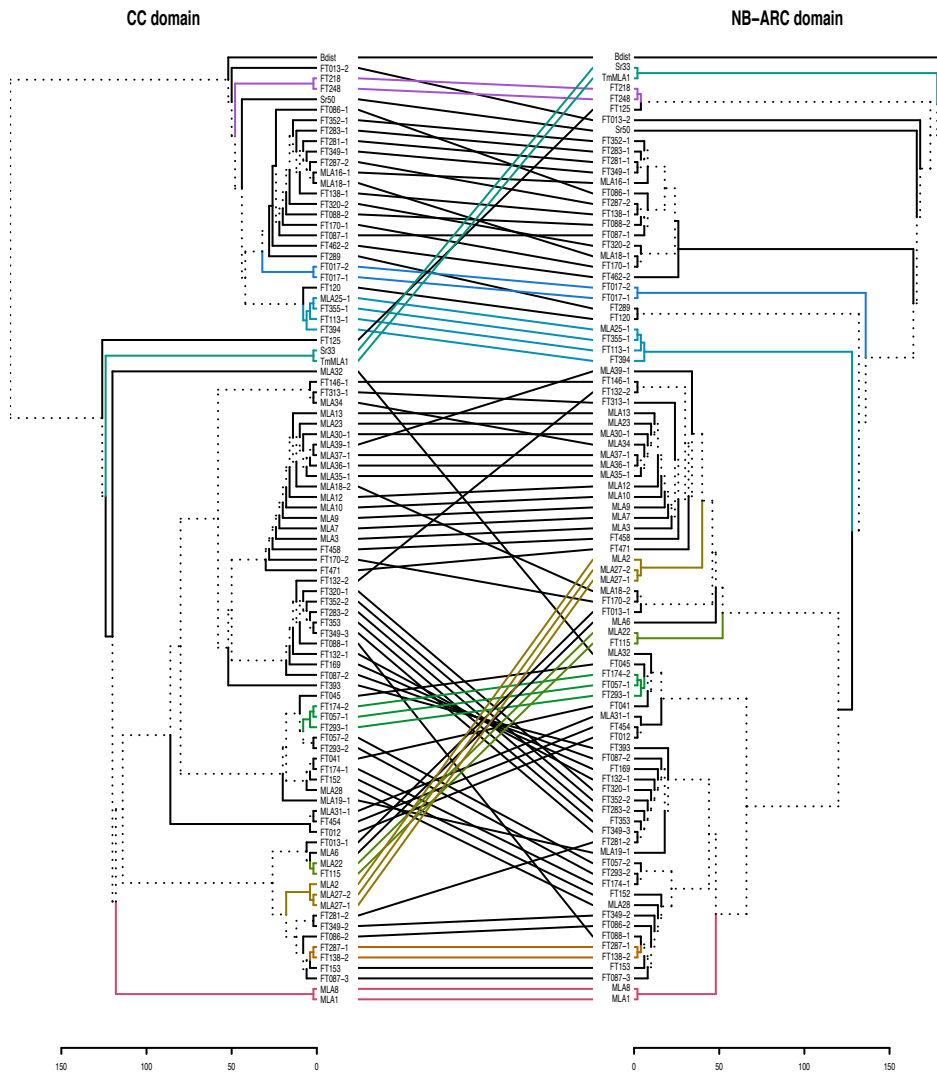

(b)

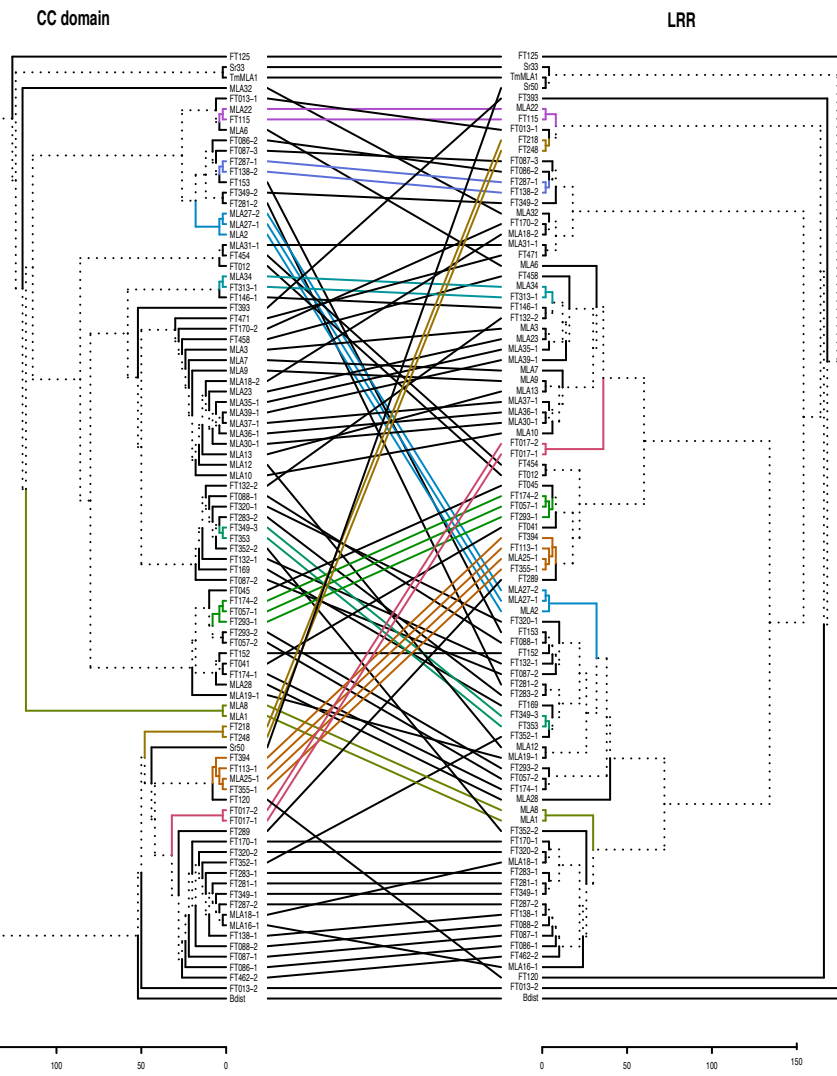

(c)

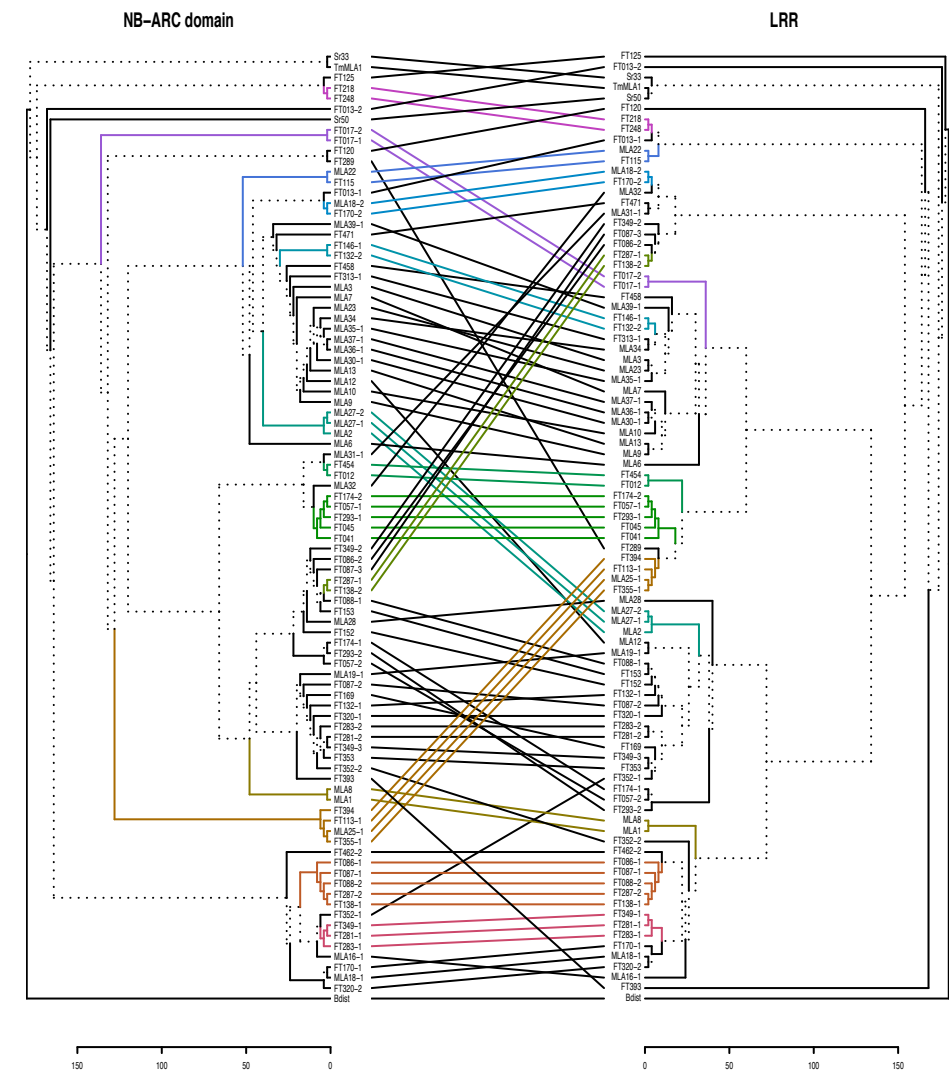

**Fig. S6: Comparison of neighbor-joining (NJ) trees obtained for the three major MLA protein domains.** (a) Comparison of NJ trees obtained for the CC (amino acids 1–151) and NB-ARC (amino acids 180–481) domains. (b) Comparison of NJ trees obtained for the CC domain (amino acids 1–151) and LRR (amino acids 490–end). (c) Comparison of NJ trees obtained for the NB-ARC domain (amino acids 180–481) and LRR (amino acids 490–end).

All trees include amino acid sequences of 28 previously published MLAs from barley (Seeholzer et al, 2010), four MLA homologs from other species, and 59 candidate MLA sequences identified in this study from 50 wild barley accessions. All positions containing gaps or missing data were omitted from the tree calculations (complete deletion option). For each comparison, a tanglegram was created from the two corresponding NJ trees using the R package ‘dendextend’, in which lines connect the same isolates and colors represent sub-trees conserved between the two domains. Branches shown as dashed lines indicate differences between the trees.

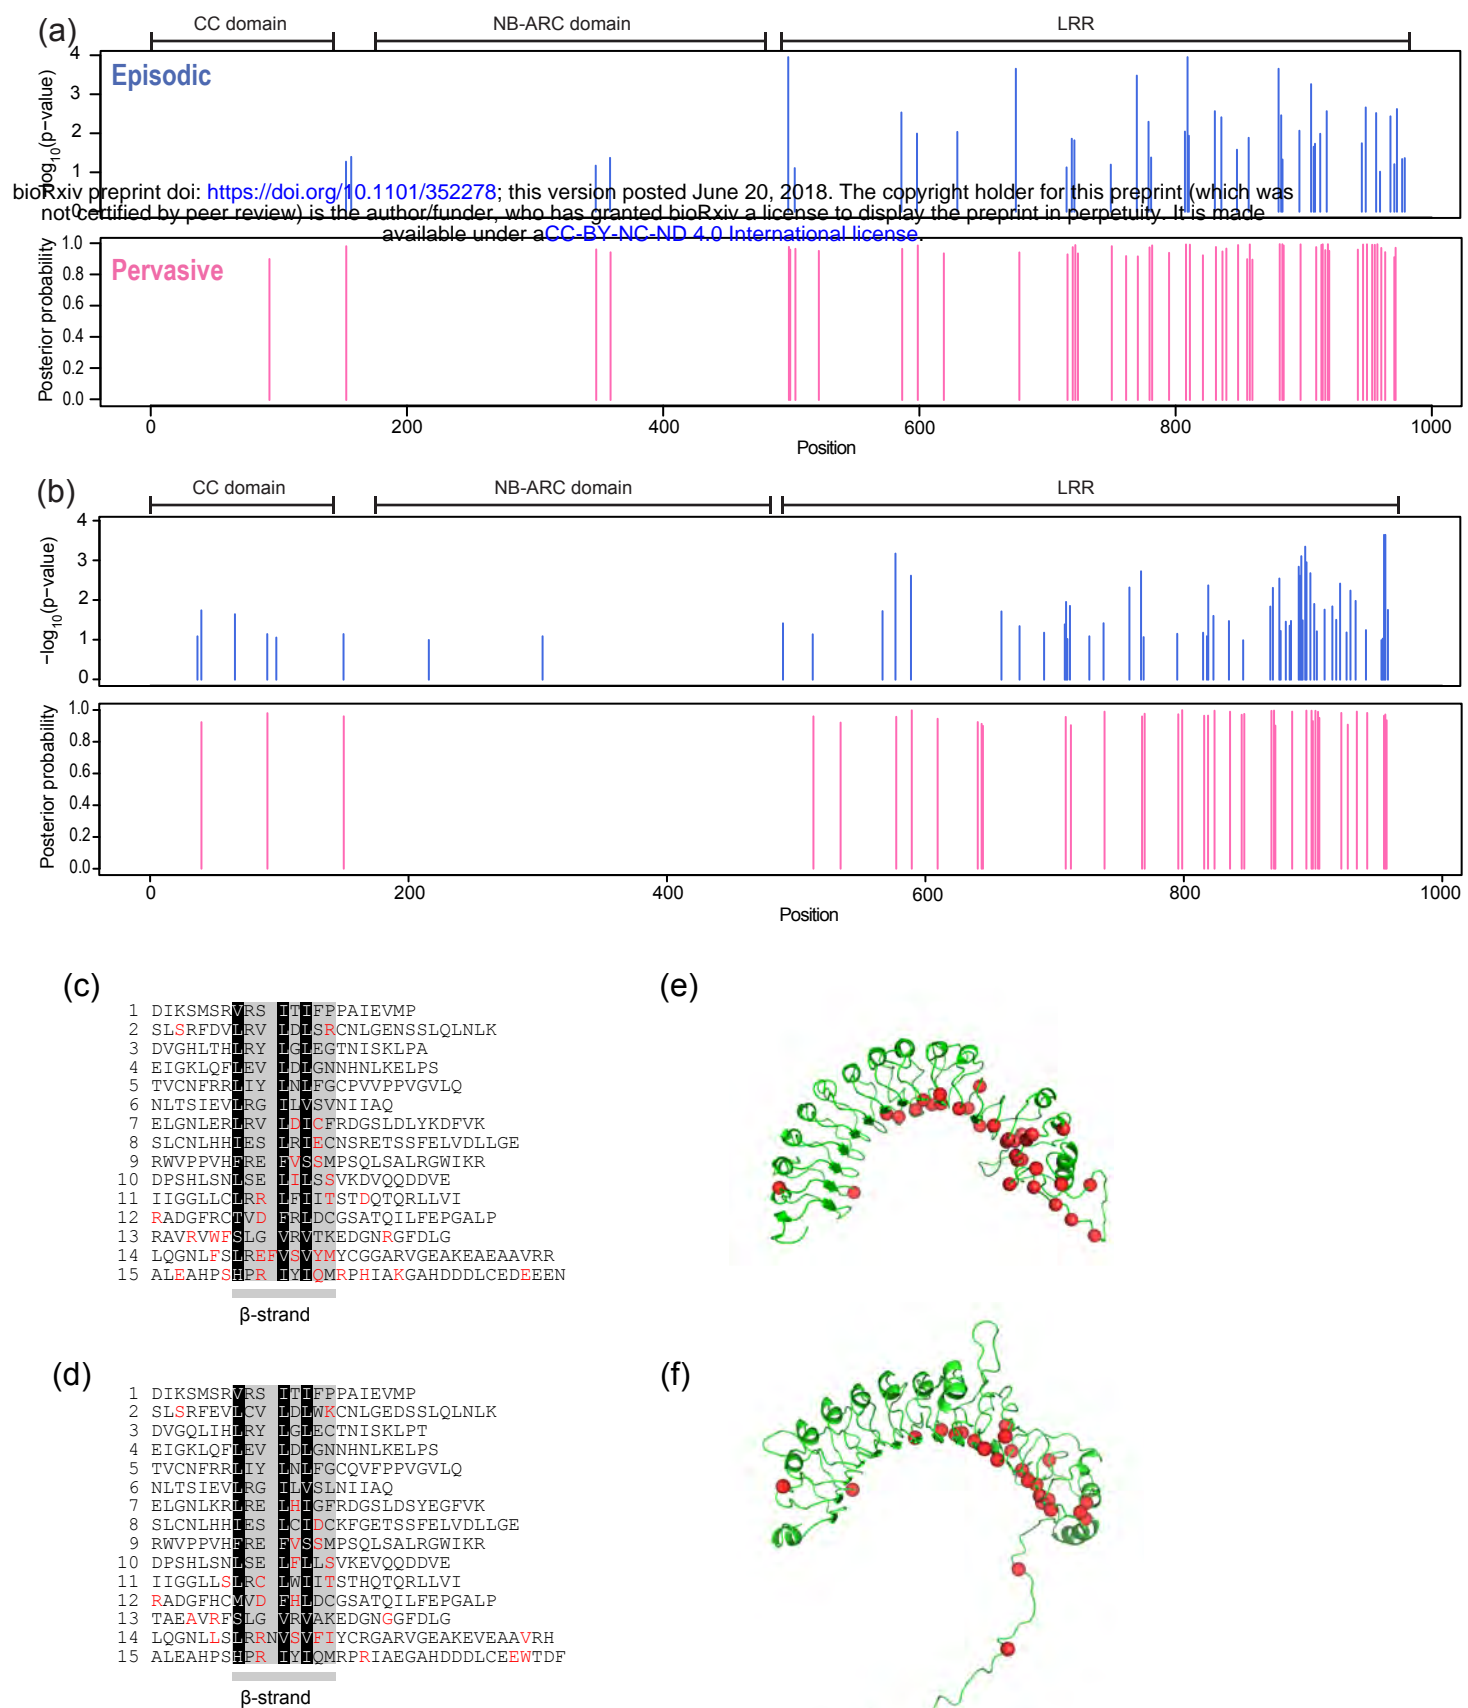

**Fig. S7: Identification of positively selected sites in MLA conferring resistance to *Bgh* and wild MLA belonging to subfamily 1.** (a) Sites under episodic (upper panel; blue bars) or pervasive (lower panel: pink bars) positive selection in a set of 25 known MLA conferring resistance to *Bgh*. (b) Sites under episodic (upper panel; blue bars) or pervasive (lower panel: pink bars) positive selection in 35 newly identified MLAs of wild barley carrying a CC domain belonging to subfamily 1. Only full-length MLA sequences (at least 895 amino acids) from barley were included in these analyses. To test for episodic selection we used MEME and judged all sites with a p value below 0.1 to be under positive selection. To test for pervasive selection, we additionally used FUBAR and judged all sites with a posterior probability above 0.95 to be under positive selection. (c) The deduced secondary structures of the 15 leucine-rich repeat regions (LRR) of MLA1. (d) The deduced secondary structures of the 15 LRR of FT352-2. MLA1 and FT352-2 are selected as representatives of MLA conferring resistance to *Bgh* and the subfamily 1 of wild barley, respectively. The first LRR starts at position 553 for both MLA1 and FT352-2. Amino acid residues under positive selection are indicated by red letters (posterior probability > 0.95). The LxxLxLxx sites, which are proposed to form a short, solvent-exposed  $\beta$ -strand motif (Kajava, et al. 1995), are indicated. Note that the 14<sup>th</sup> LRR is irregular with three instead of two x positions after the first L position. Black: hydrophobic core residue; gray: site of any amino acid termed x in the LxxLxLxx motif. (e) The hypothetical tertiary structures of LRR of MLA1 shown in (c) predicted by IntFOLD (McGuffin, et al. 2015). (f) The hypothetical tertiary structures of LRR of FT352-2 shown in (d) predicted by IntFOLD. Amino acid residues under positive selection are indicated by red spheres (posterior probability > 0.95).
